# Supplementary material for: New molecular design for blue BODIPYs
Source: Royal Society of Chemistry journal article supplement (doi:10.1039/c9nj01114e), 2019-01-01

Supplementary Information for:  
**New Molecular Design for Blue BODIPYs**

Zhiyuan Wu,<sup>a</sup> Hikaru Fujita,<sup>a</sup> Nikki Cecil M. Magdaong,<sup>b</sup> James R. Diers,<sup>c</sup>  
Don Hood,<sup>b</sup> Srinivasarao Allu,<sup>a</sup> Dariusz M. Niedzwiedzki,<sup>d</sup> Christine Kirmaier,<sup>b</sup>  
David F. Bocian,<sup>c,\*</sup> Dewey Holten,<sup>b,\*</sup> and Jonathan S. Lindsey<sup>a,\*</sup>

<sup>a</sup> Department of Chemistry  
North Carolina State University  
Raleigh, North Carolina 27695-8204

<sup>b</sup> Department of Chemistry  
Washington University  
St. Louis, Missouri 63130-4889

<sup>c</sup> Department of Chemistry  
University of California  
Riverside, California 92521-0403

<sup>d</sup> Department of Energy, Environmental & Chemical Engineering  
and Center for Solar Energy and Energy Storage  
Washington University  
St. Louis, Missouri 63130-4889

**Table of Contents**

| <u>Topic</u>                      | <u>Page</u> |
|-----------------------------------|-------------|
| Summary of crystal data           | S2          |
| Molar absorption coefficient data | S3          |
| Photophysical data                | S3          |
| Spectral data                     | S4          |

**Table S1.** Summary of crystal data for dihydrodipyrin–complexes.

|                                                    | <b>1-BBu<sub>2</sub></b>                                       | <b>2-BBu<sub>2</sub></b>                                         | <b>2-BF<sub>2</sub></b>                                                         |
|----------------------------------------------------|----------------------------------------------------------------|------------------------------------------------------------------|---------------------------------------------------------------------------------|
| CCDC registry                                      | 1900105                                                        | 1900106                                                          | 1900107                                                                         |
| Formula                                            | C <sub>23</sub> H <sub>37</sub> BN <sub>2</sub> O <sub>2</sub> | C <sub>23</sub> H <sub>36</sub> BBrN <sub>2</sub> O <sub>2</sub> | C <sub>15</sub> H <sub>18</sub> BBrF <sub>2</sub> N <sub>2</sub> O <sub>2</sub> |
| Formula Weight (g/mol)                             | 384.35                                                         | 463.26                                                           | 387.03                                                                          |
| Crystal Dimensions (mm)                            | 0.232 × 0.264 × 0.370                                          | 0.184 × 0.298 × 0.425                                            | 0.212 × 0.326 × 0.418                                                           |
| Crystal System                                     | monoclinic                                                     | hexagonal                                                        | triclinic                                                                       |
| Space Group                                        | P 1 21/n 1                                                     | P 65                                                             | P -1                                                                            |
| Temperature, K                                     | 180(2)                                                         | 100(2)                                                           | 100(2)                                                                          |
| <i>a</i> , Å                                       | 11.8186(2)                                                     | 9.6838(2)                                                        | 7.1235(2)                                                                       |
| <i>b</i> , Å                                       | 9.1192(2)                                                      | 9.6838(2)                                                        | 11.0063(3)                                                                      |
| <i>c</i> , Å                                       | 22.4535(5)                                                     | 43.5738(8)                                                       | 11.5158(3)                                                                      |
| α, deg                                             | 90                                                             | 90                                                               | 66.4695(11)                                                                     |
| β, deg                                             | 103.9509(8)                                                    | 90                                                               | 84.0270(12)                                                                     |
| γ, deg                                             | 90                                                             | 120                                                              | 83.5531(13)                                                                     |
| <i>V</i> , Å <sup>3</sup>                          | 2348.57(8)                                                     | 3538.73(16)                                                      | 820.83(4)                                                                       |
| Number of reflections to determine final unit cell | 281                                                            | 378                                                              | 246                                                                             |
| Min and Max 2θ for cell determination (deg)        | 3.815, 45.38                                                   | 17.95, 63.19                                                     | 4.280, 66.43                                                                    |
| <i>Z</i>                                           | 4                                                              | 6                                                                | 2                                                                               |
| <i>F</i> (000)                                     | 840                                                            | 1464                                                             | 392                                                                             |
| ρ (g/cm)                                           | 1.087                                                          | 1.304                                                            | 1.566                                                                           |
| λ, Å, (MoKα)                                       | 0.71073                                                        | 0.71073                                                          | 0.71073                                                                         |
| μ, (mm <sup>-1</sup> )                             | 0.068                                                          | 1.763                                                            | 2.533                                                                           |
| Max 2θ for data collection (deg)                   | 47.64                                                          | 66.32                                                            | 73.08                                                                           |
| Measured fraction of data                          | 0.998                                                          | 1.000                                                            | 0.998                                                                           |
| Number of reflections measured                     | 32991                                                          | 185013                                                           | 52690                                                                           |
| Unique reflections measured                        | 3604                                                           | 8999                                                             | 8056                                                                            |
| R <sub>merge</sub>                                 | 2.14%                                                          | 4.74%                                                            | 2.70%                                                                           |
| Number of parameters in least-squares              | 392                                                            | 268                                                              | 212                                                                             |
| R <sub>1</sub>                                     | 0.0441                                                         | 0.0331                                                           | 0.0237                                                                          |
| wR <sub>2</sub>                                    | 0.1140                                                         | 0.0773                                                           | 0.0588                                                                          |
| R <sub>1</sub> (all data)                          | 0.0561                                                         | 0.0347                                                           | 0.0303                                                                          |
| wR <sub>2</sub> (all data)                         | 0.1252                                                         | 0.0779                                                           | 0.0608                                                                          |

**Table S2.** Molar absorption coefficient of dihydrodipyrrin complexes.

| Compound                 | Abs (nm)<br>in toluene | $\epsilon$ ( $M^{-1}\cdot cm^{-1}$ )<br>in toluene | Abs (nm)<br>in acetonitrile | $\epsilon$ ( $M^{-1}\cdot cm^{-1}$ )<br>in acetonitrile |
|--------------------------|------------------------|----------------------------------------------------|-----------------------------|---------------------------------------------------------|
| <b>1-BBu<sub>2</sub></b> | 398                    | $1.1\times 10^4$                                   | 377                         | $1.1\times 10^4$                                        |
| <b>2</b>                 | 332                    | $2.5\times 10^4$                                   | 322                         | $2.3\times 10^4$                                        |
| <b>2-BBu<sub>2</sub></b> | 399                    | $8.6\times 10^3$                                   | 375                         | $9.1\times 10^3$                                        |
| <b>2-BF<sub>2</sub></b>  | 400                    | $1.1\times 10^4$                                   | –                           | –                                                       |
| <b>3-BBu<sub>2</sub></b> | 408                    | $1.1\times 10^4$                                   | –                           | –                                                       |
| <b>3-BF<sub>2</sub></b>  | 400                    | $1.3\times 10^4$                                   | –                           | –                                                       |
| <b>4-BBu<sub>2</sub></b> | 436                    | $1.5\times 10^4$                                   | –                           | –                                                       |

Fluorescence yields were determined against two standards using several different excitation wavelengths and the results were averaged. Single excited-state lifetimes were determined on two transient absorption spectrometers and by fluorescence decay and the results were averaged. The values and averages are given in Table S3.

**Table S3.** Photophysical properties.<sup>a</sup>

| Cmpd                     | Solvent | $\Phi_f$<br>vs<br>pyranine | $\Phi_f$<br>vs<br><b>BDPY1</b> | $\Phi_f$<br>avg | $\tau_s$<br>Helios<br>TA<br>(ns) | $\tau_s$<br>EOS<br>TA<br>(ns) | $\tau_s$<br>TCSPC<br>(ns) | $\tau_s$<br>(ns) |
|--------------------------|---------|----------------------------|--------------------------------|-----------------|----------------------------------|-------------------------------|---------------------------|------------------|
| <b>1-BBu<sub>2</sub></b> | toluene | 0.89                       | 0.84                           | $0.87 \pm 0.04$ | 8.0                              | 6.6                           | 7.9                       | $7.5 \pm 0.8$    |
| <b>1-BBu<sub>2</sub></b> | MeCN    | 0.87                       | 0.90                           | $0.88 \pm 0.04$ |                                  | 9.0                           | 8.6                       | $8.8 \pm 0.3$    |
| <b>1-BBu<sub>2</sub></b> | DMSO    | 0.88                       | 0.92                           | $0.90 \pm 0.04$ |                                  | 7.7                           | 8.0                       | $7.9 \pm 0.2$    |
| <b>2-BBu<sub>2</sub></b> | toluene | 0.81                       | 0.81                           | $0.81 \pm 0.01$ | 7.2                              | 6.4                           | 7.3                       | $7.0 \pm 0.5$    |
| <b>2-BF<sub>2</sub></b>  | toluene | 0.43                       | 0.41                           | $0.42 \pm 0.01$ | 5.1                              | 4.8                           | 4.8                       | $4.9 \pm 0.2$    |
| <b>3-BBu<sub>2</sub></b> | toluene | 0.91                       | 0.85                           | $0.88 \pm 0.03$ | 6.2                              | 7.4                           | 7.5                       | $7.0 \pm 0.7$    |
| <b>3-BF<sub>2</sub></b>  | toluene | 0.4                        | 0.36                           | $0.38 \pm 0.04$ | 5.0                              | 4.8                           | 4.8                       | $4.9 \pm 0.1$    |
| <b>4-BBu<sub>2</sub></b> | toluene | 0.3                        | 0.29                           | $0.30 \pm 0.04$ | 3.9                              | 3.8                           | 3.9                       | $3.9 \pm 0.1$    |

<sup>a</sup>All data were acquired at room temperature. MeCN is acetonitrile and DMSO is dimethylsulfoxide. Fluorescence yields were determined for deoxygenated samples relative to standards pyranine ( $\Phi_f = 1.0$  in 0.10 M NaOH<sup>23</sup>) and 5-mesityldipyrrinatoboron difluoride (**BDPY1**) ( $\Phi_f = 0.93$  in toluene<sup>24</sup>) and averaged. Singlet excited-state lifetimes ( $\tau_s$ ) were determined via transient absorption (TA) spectroscopy using Helios (–2 ps to 7 ns) and EOS (–2 ns to 40 ns) spectrometers and via fluorescence decay using time correlated single photon counting (TCSPC) and the resulting three values were averaged.

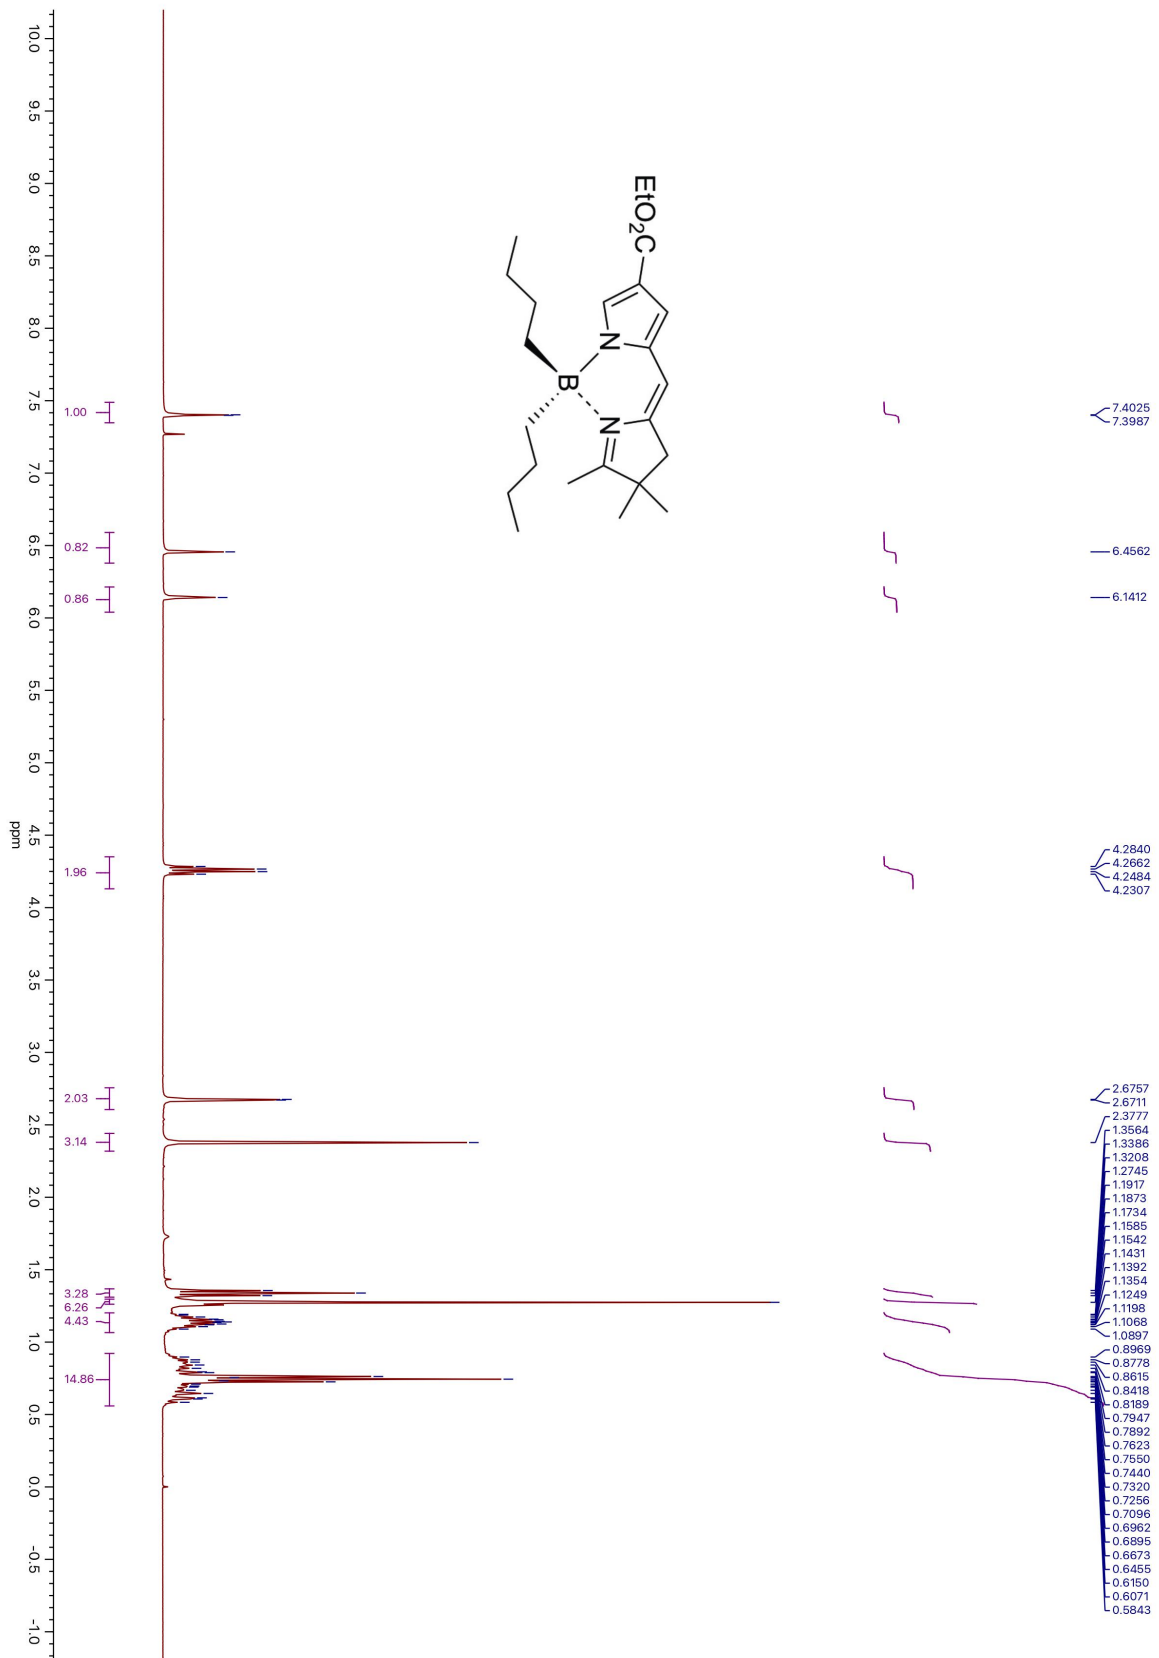

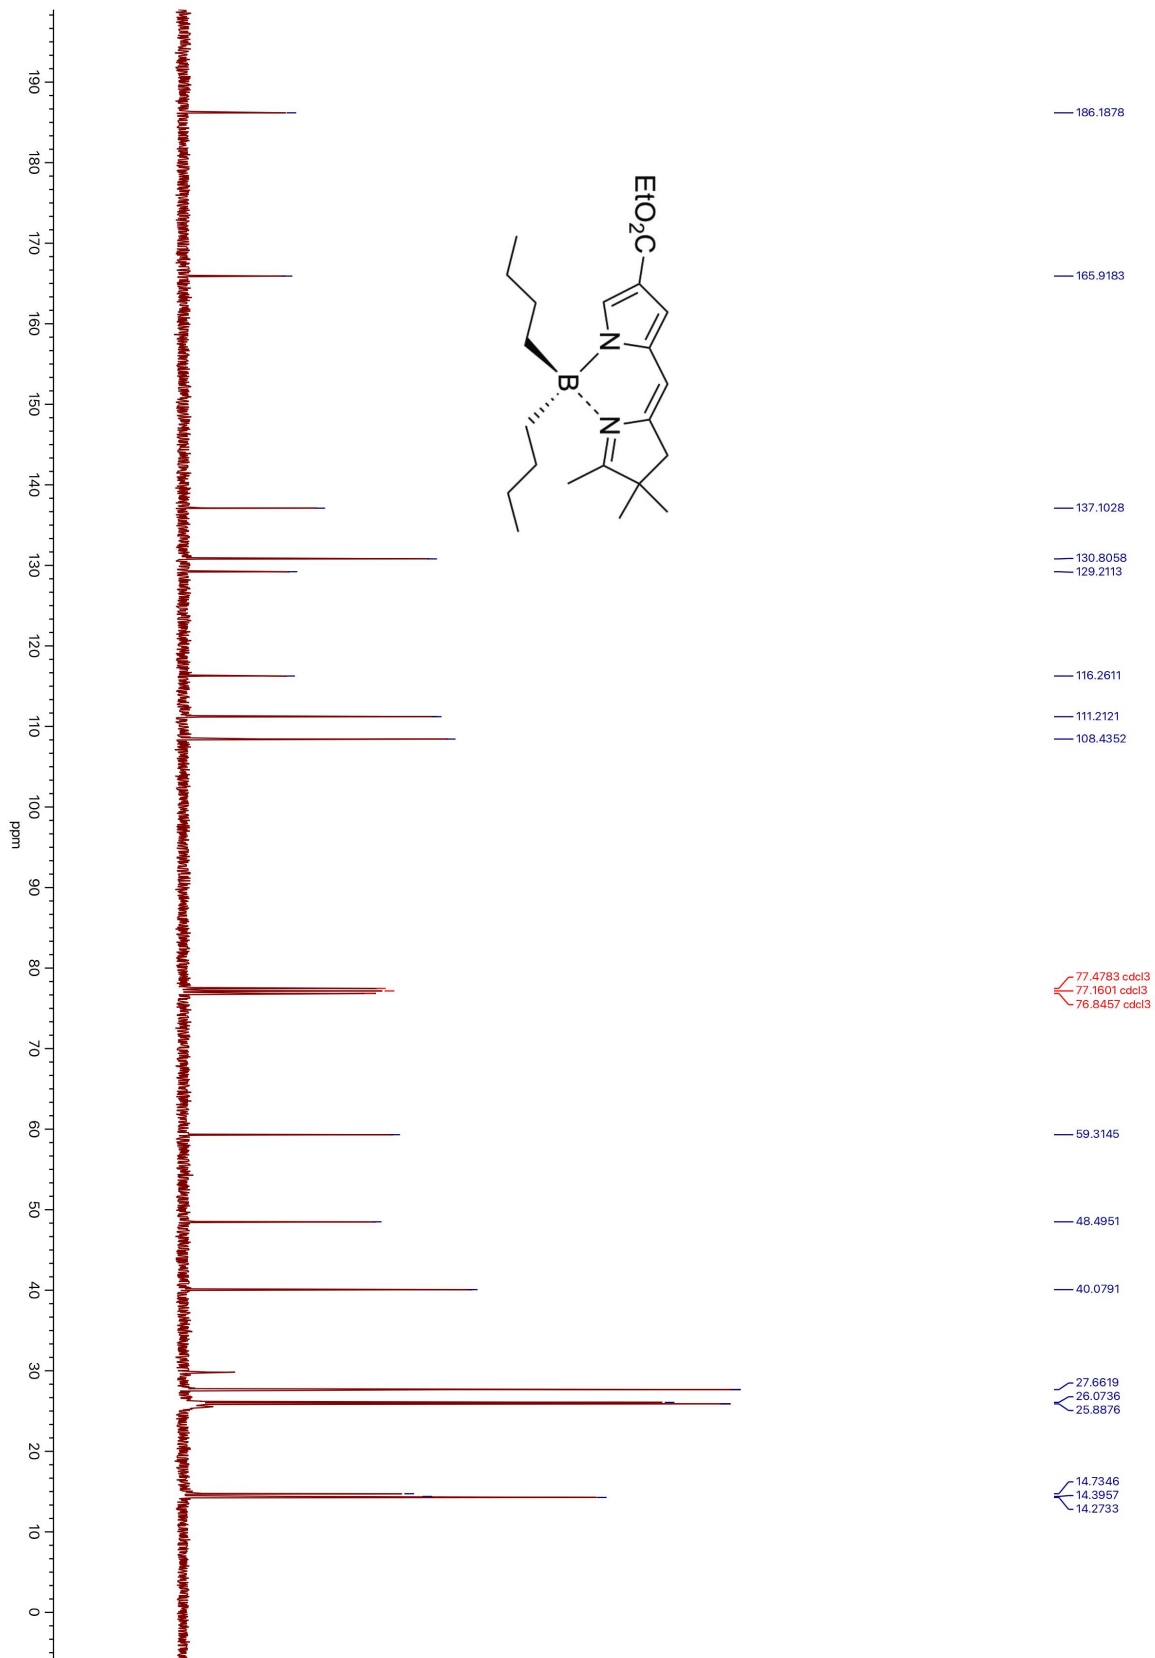

<sup>11</sup>B NMR spectrum

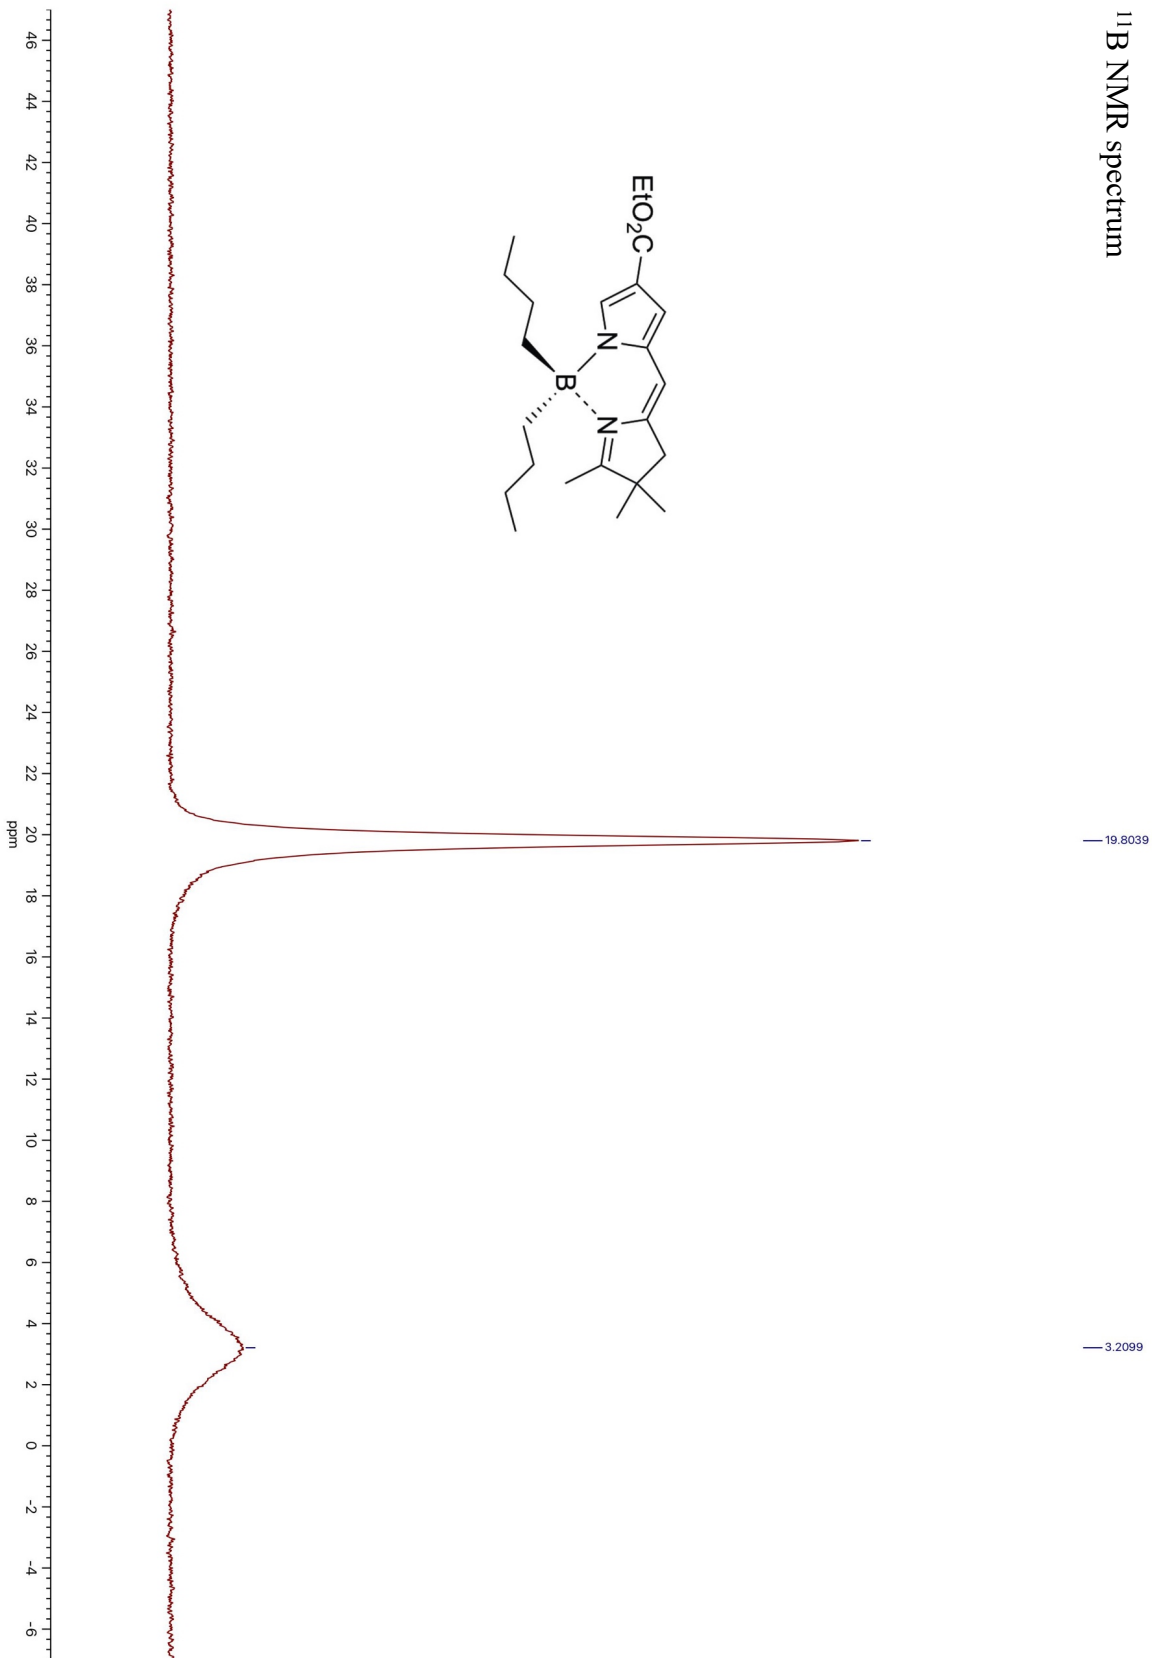

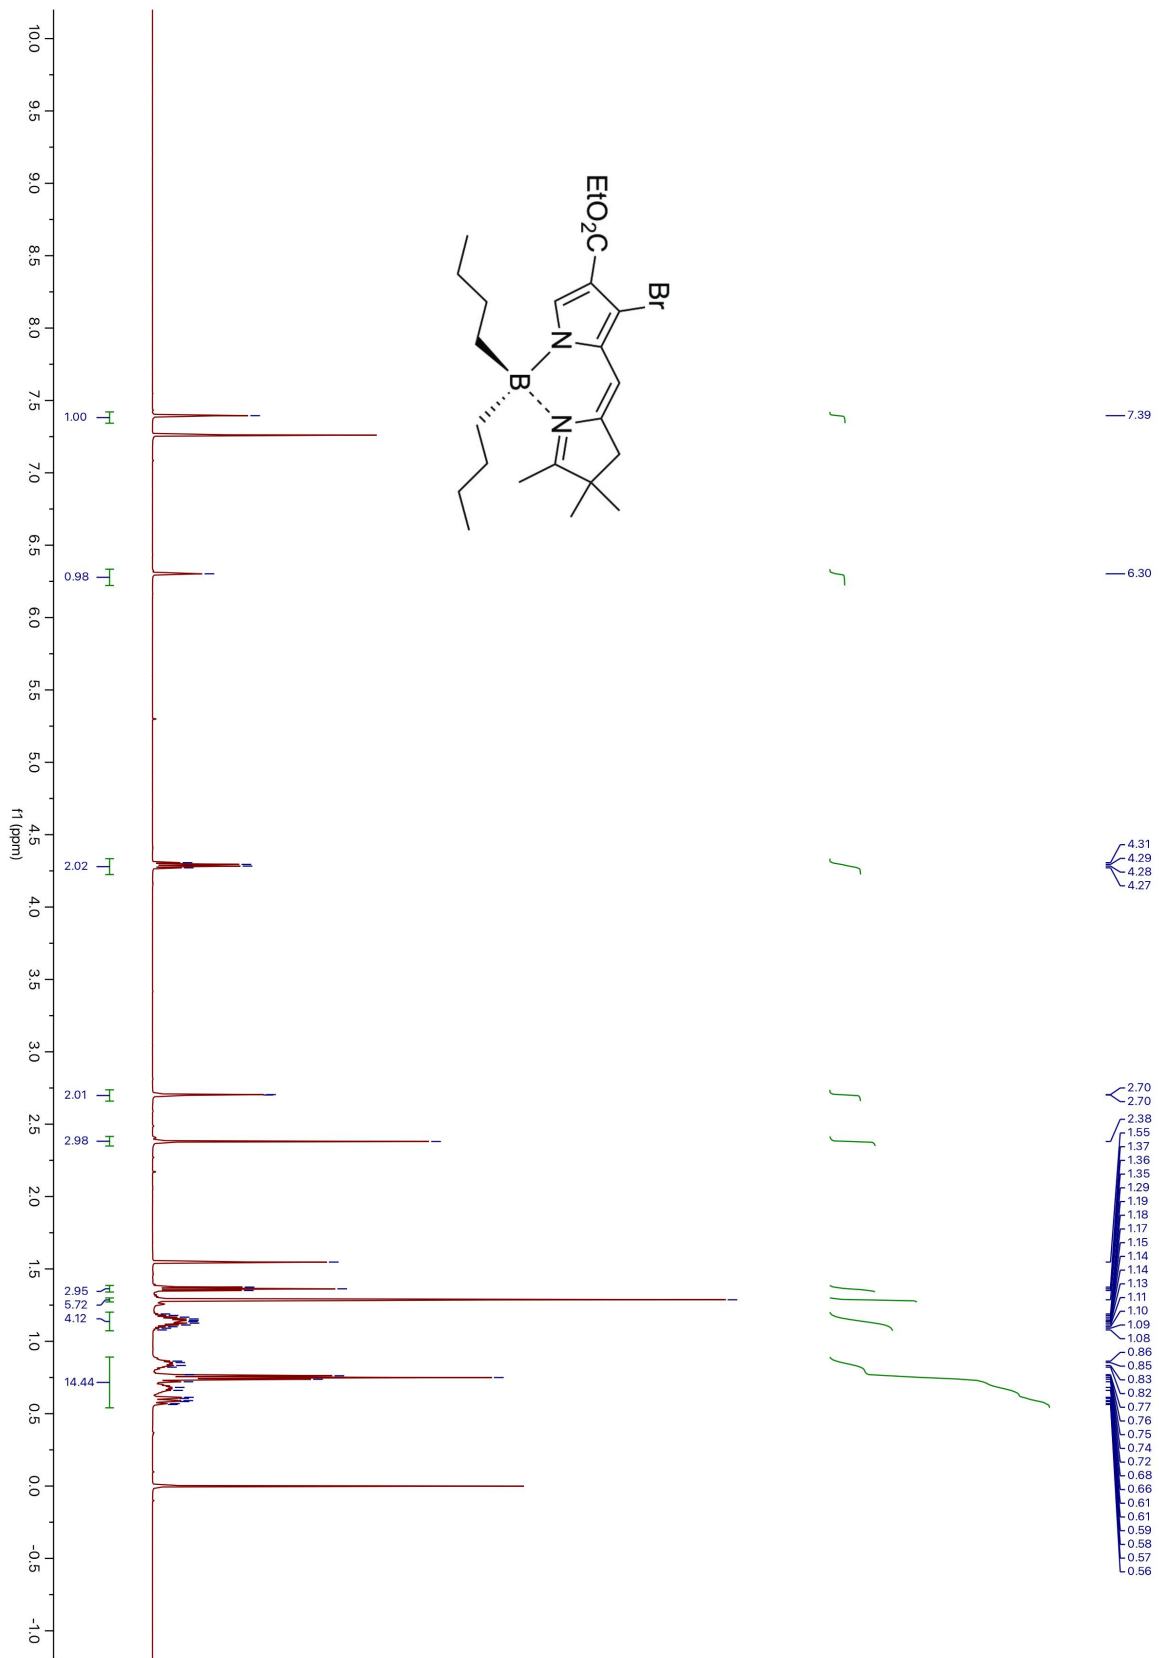

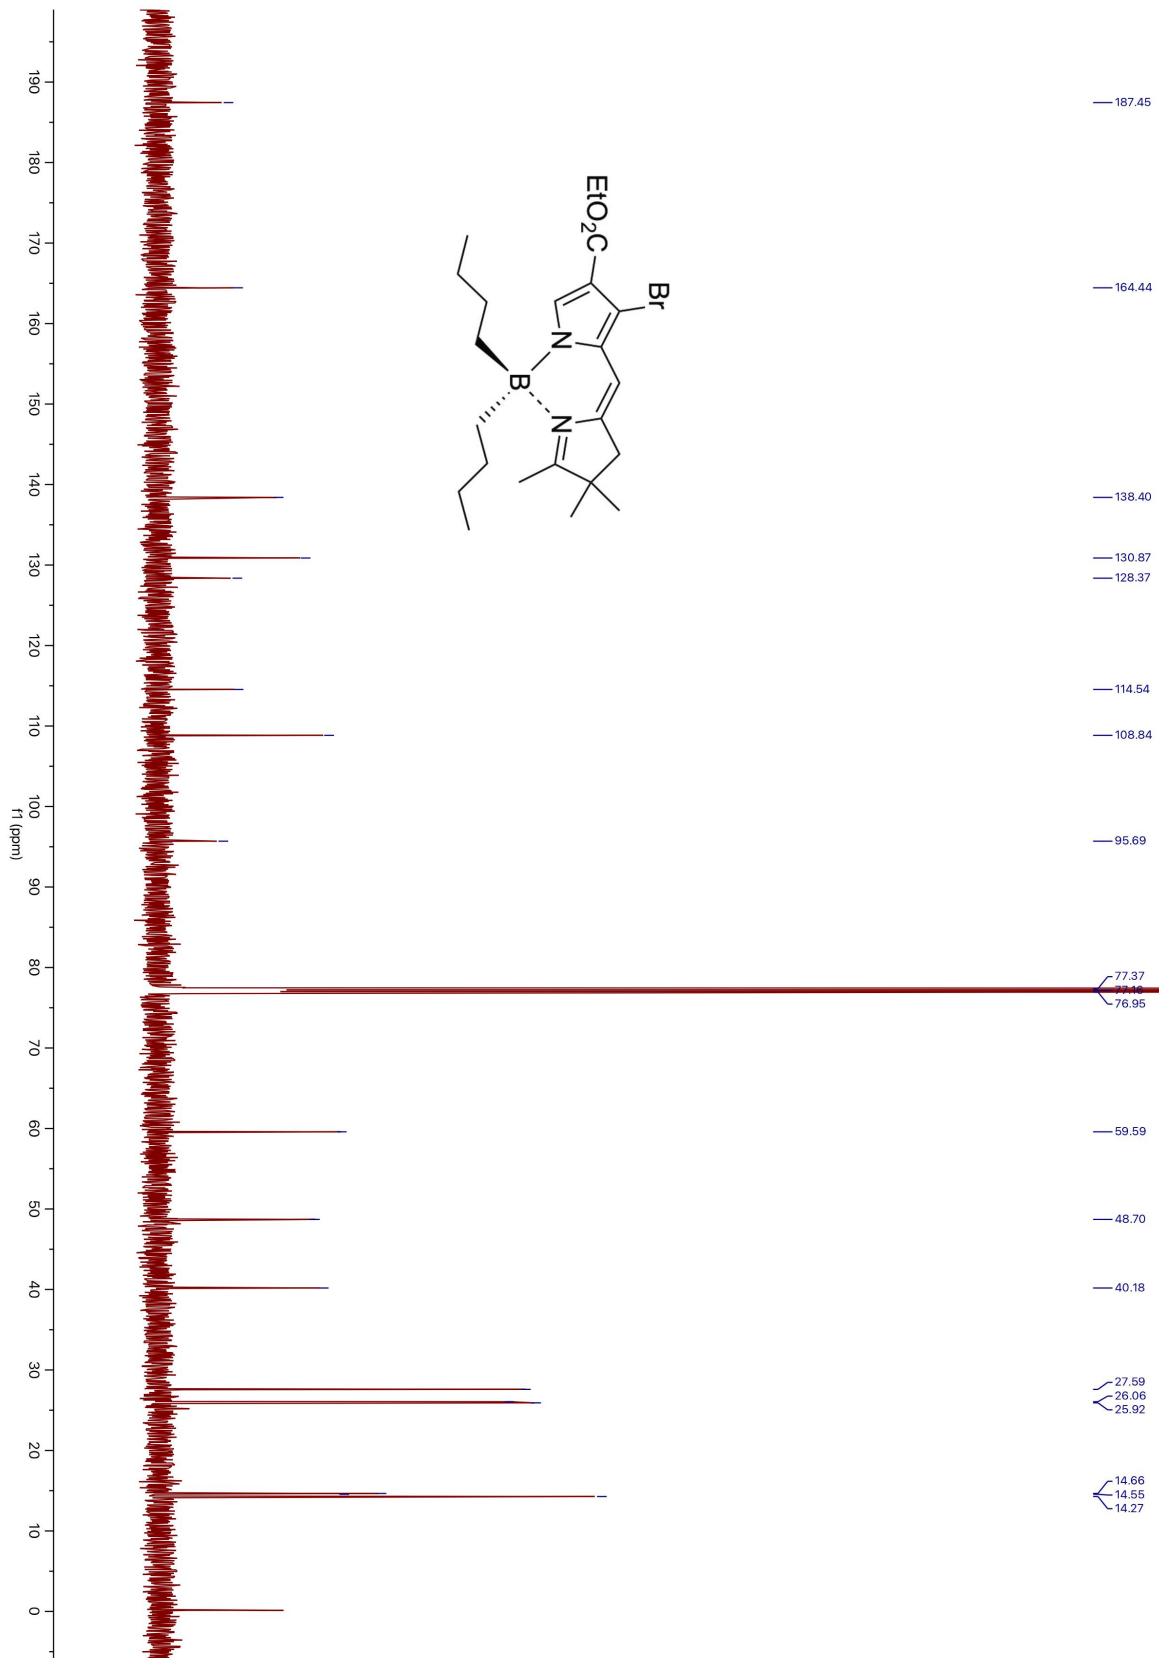



<sup>11</sup>B NMR spectrum

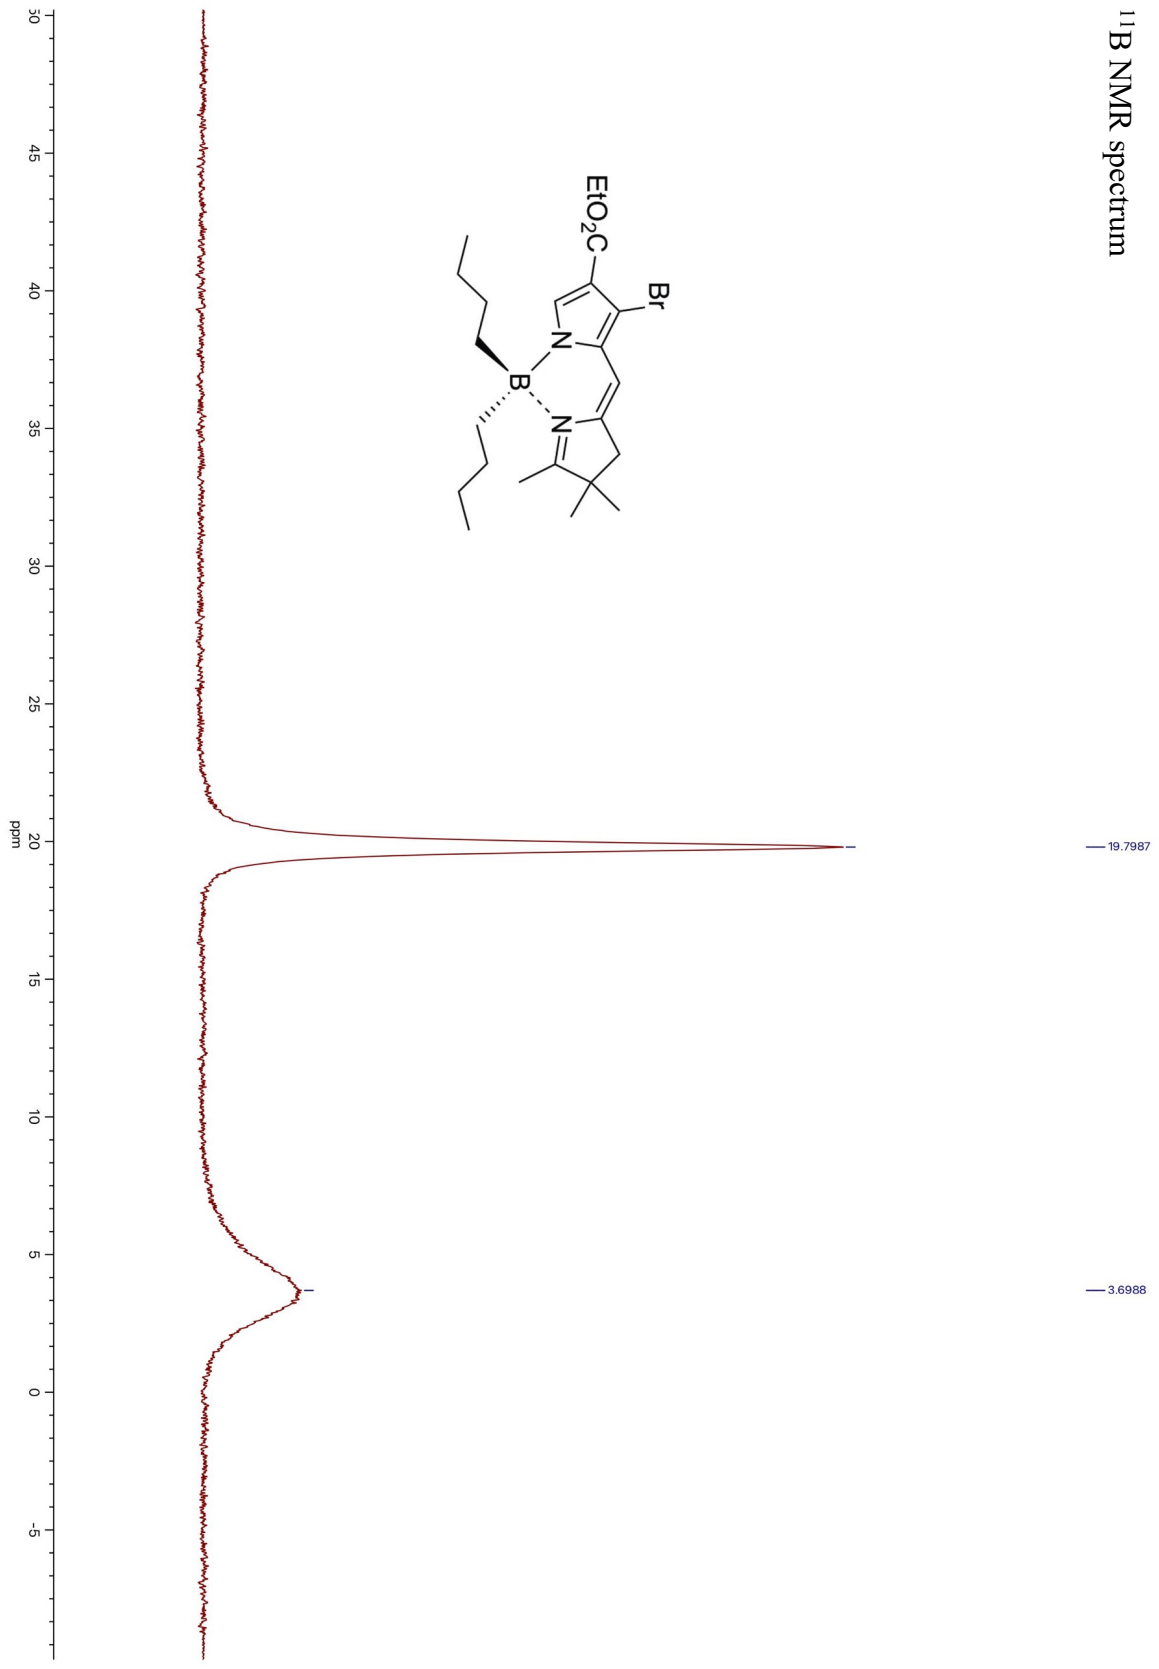

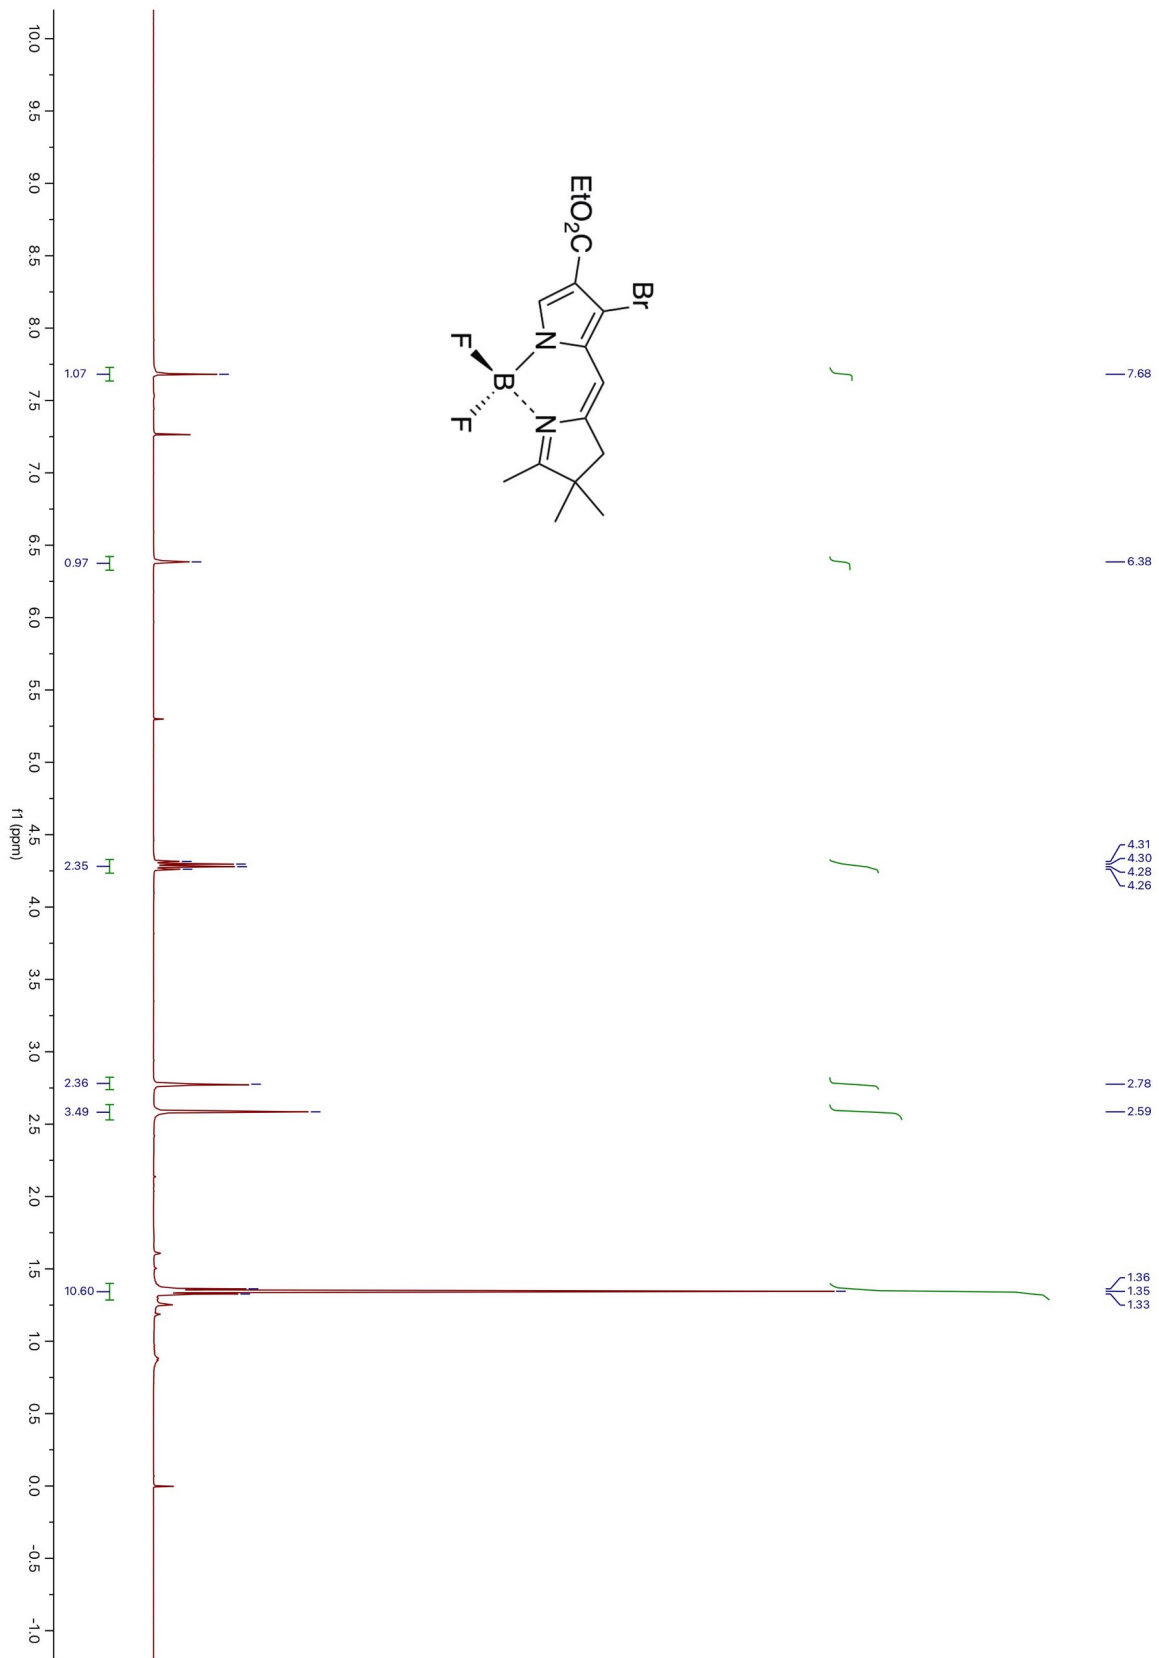

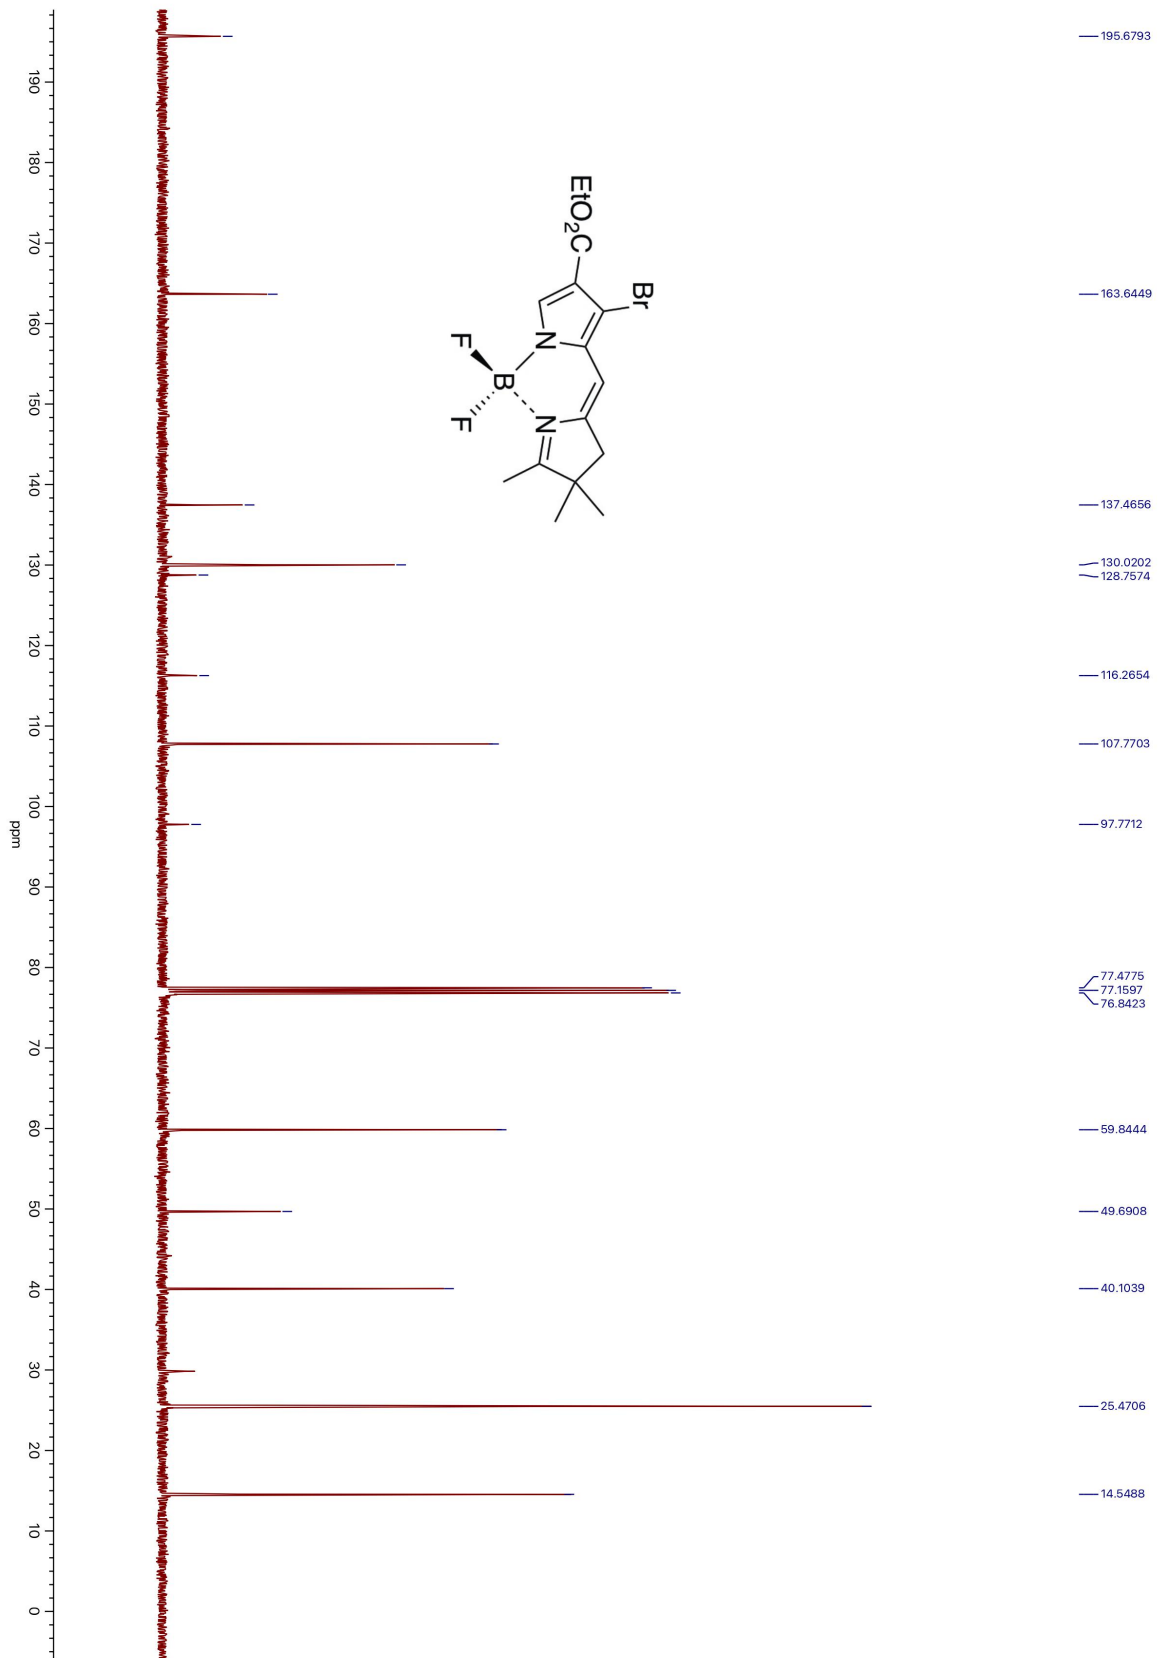

$^{11}\text{B}$  NMR spectrum

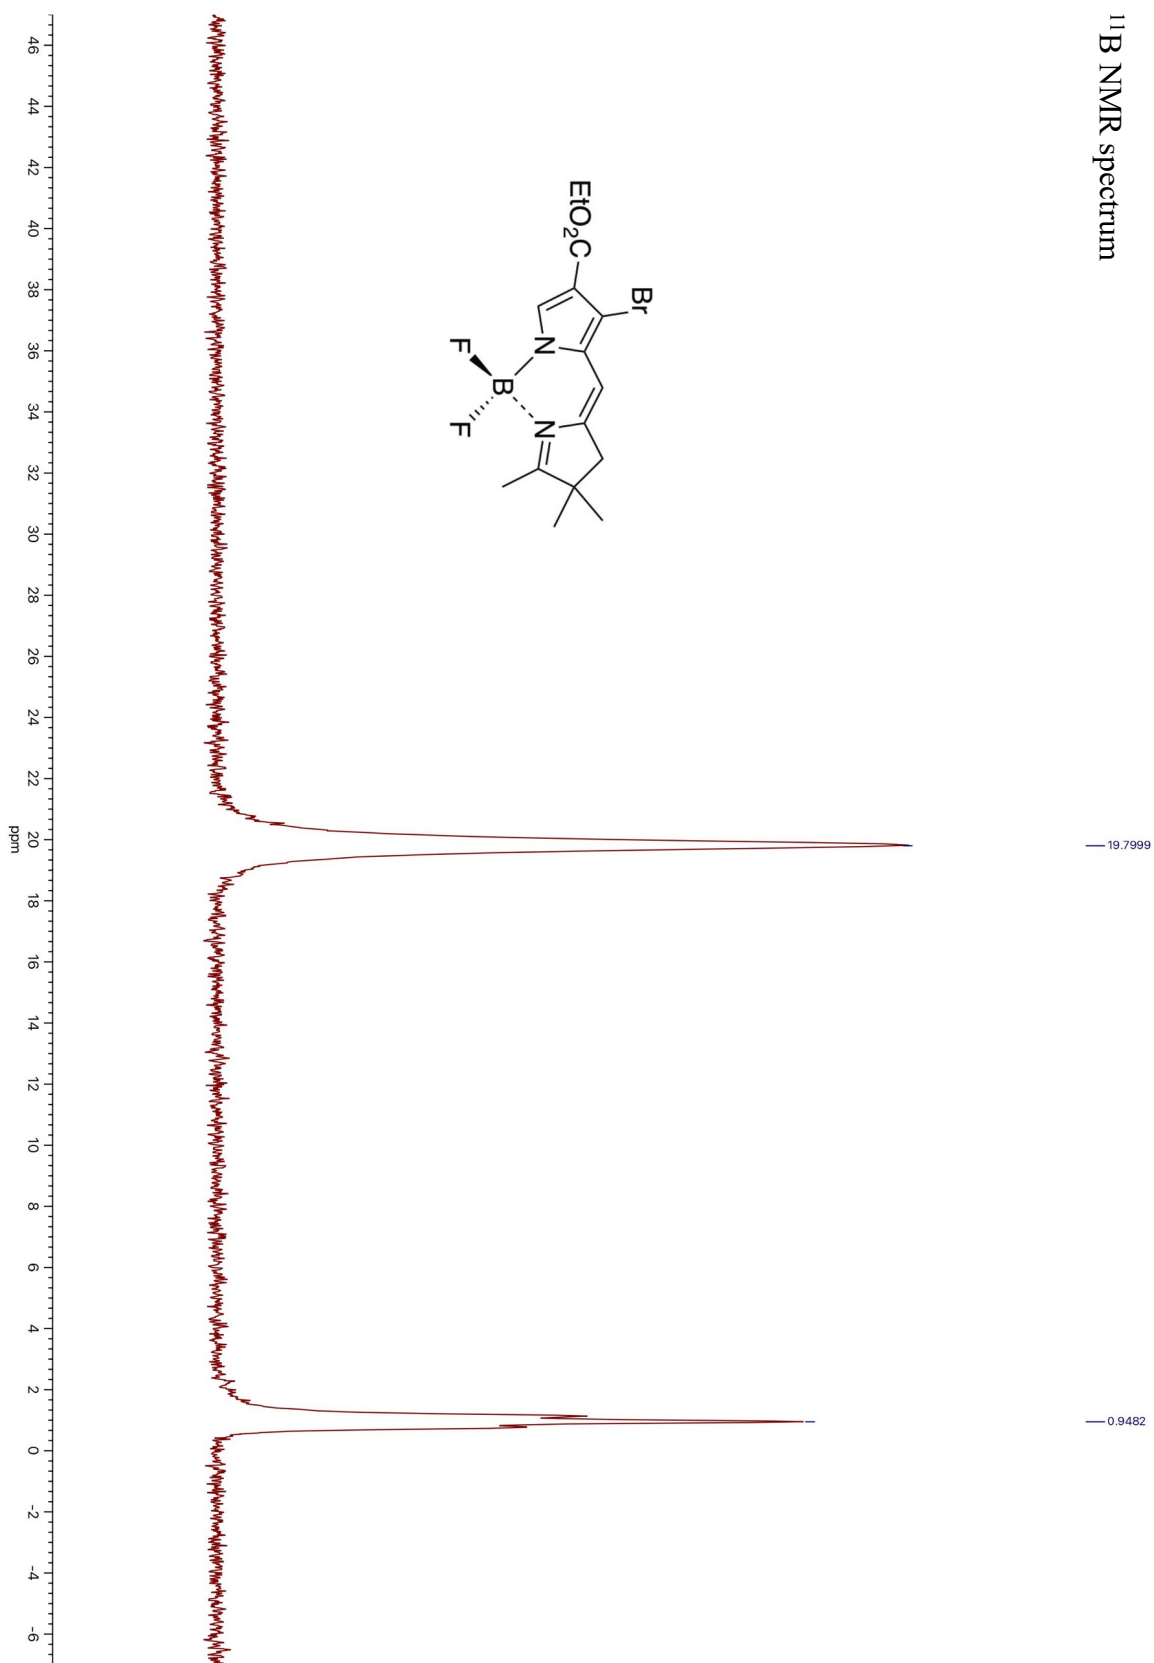

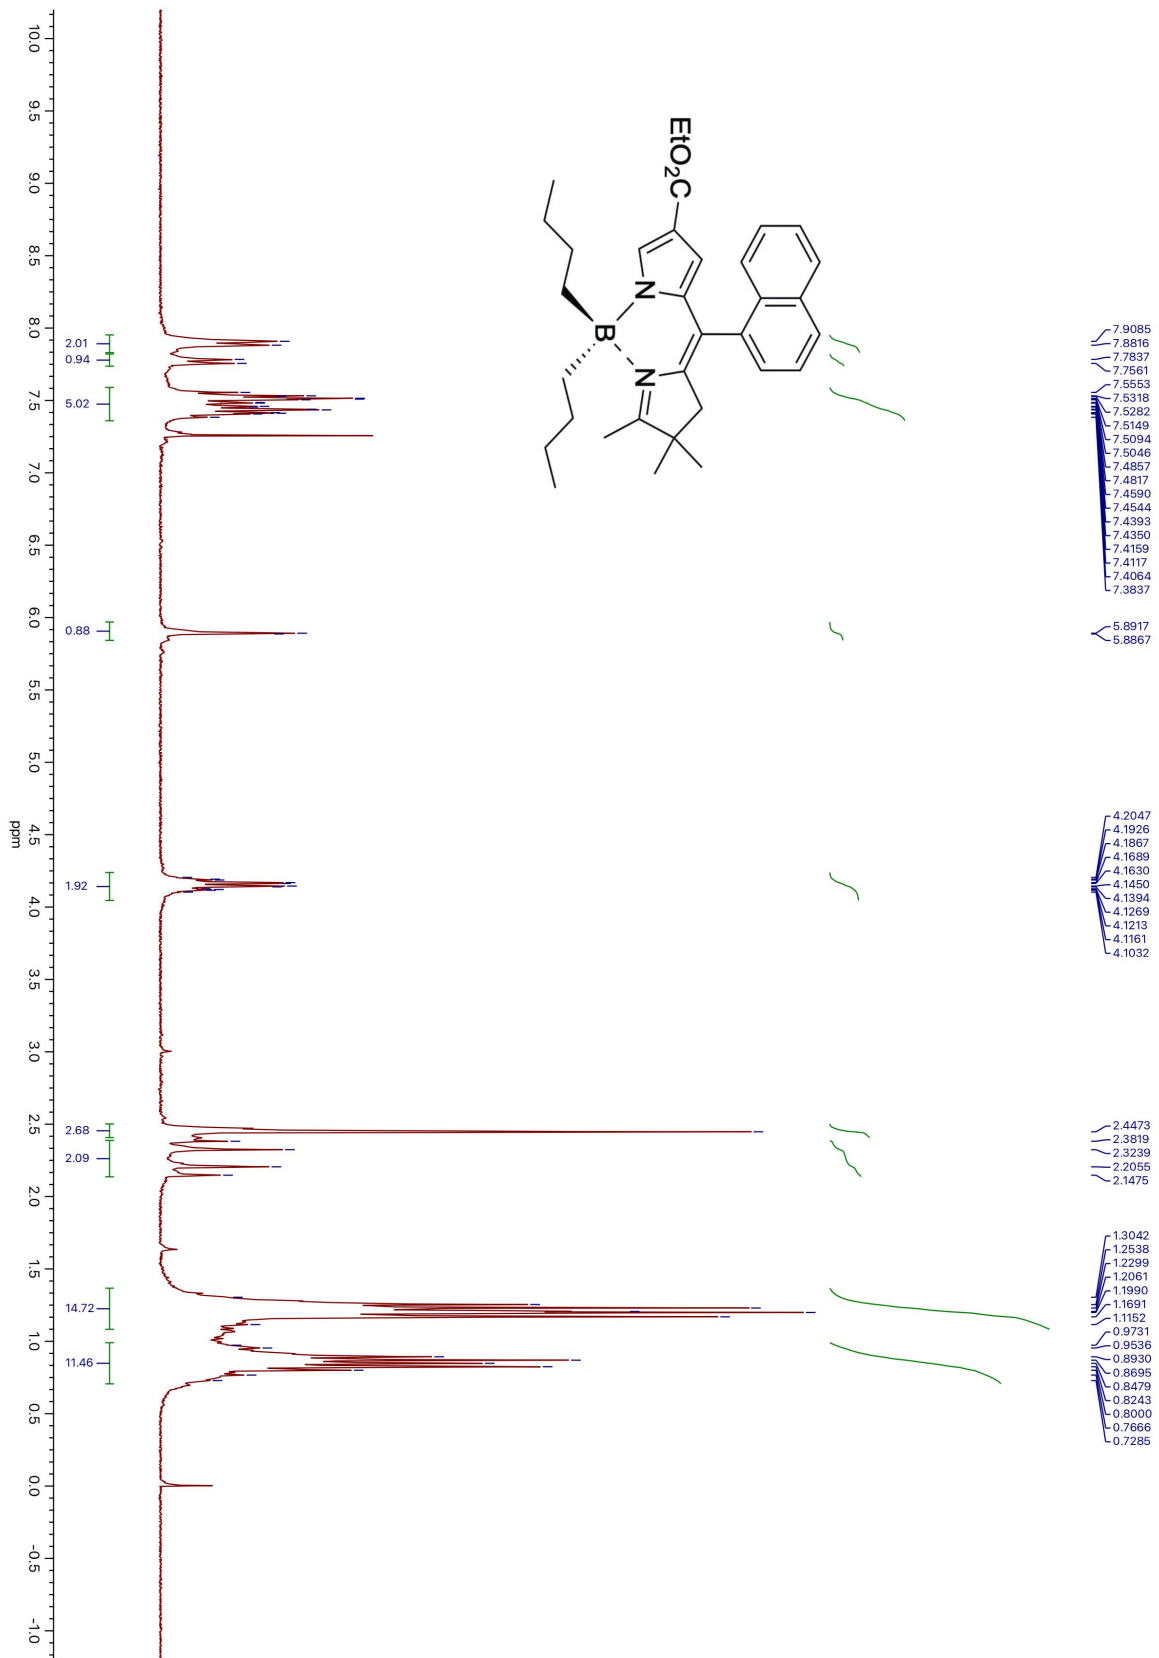

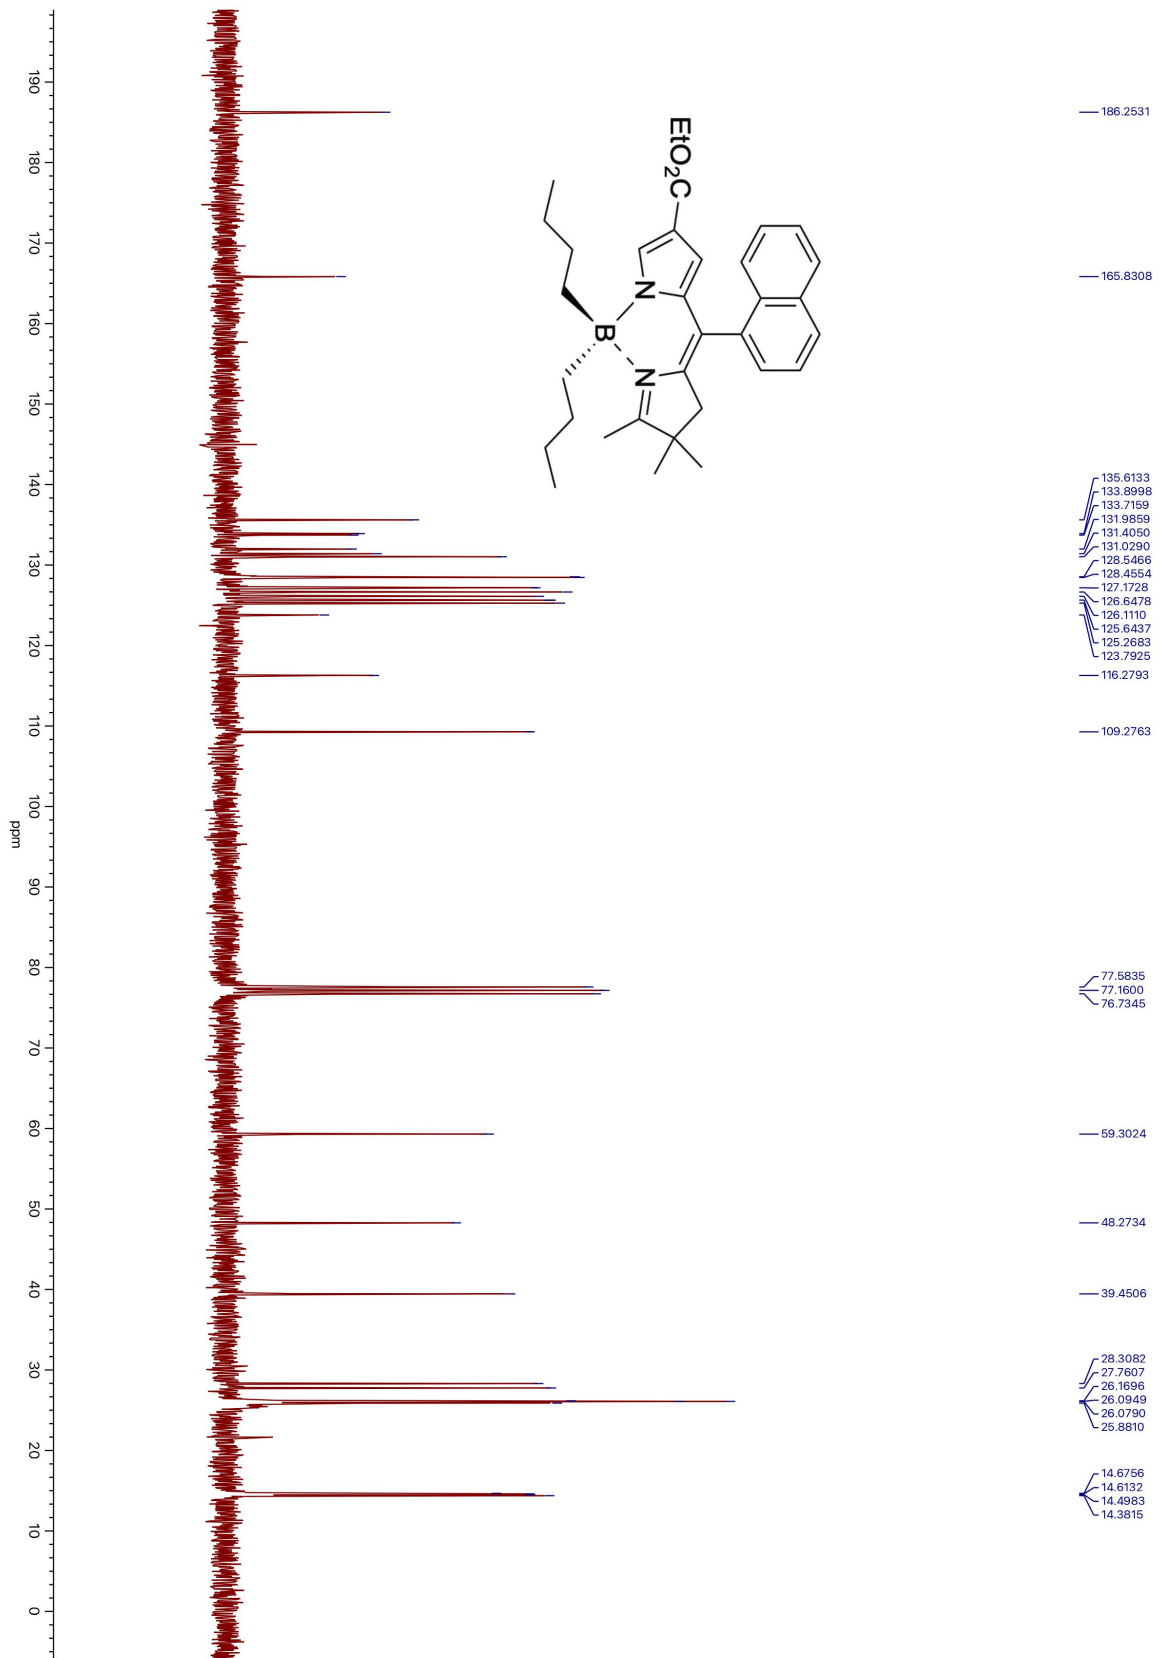

<sup>11</sup>B NMR spectrum

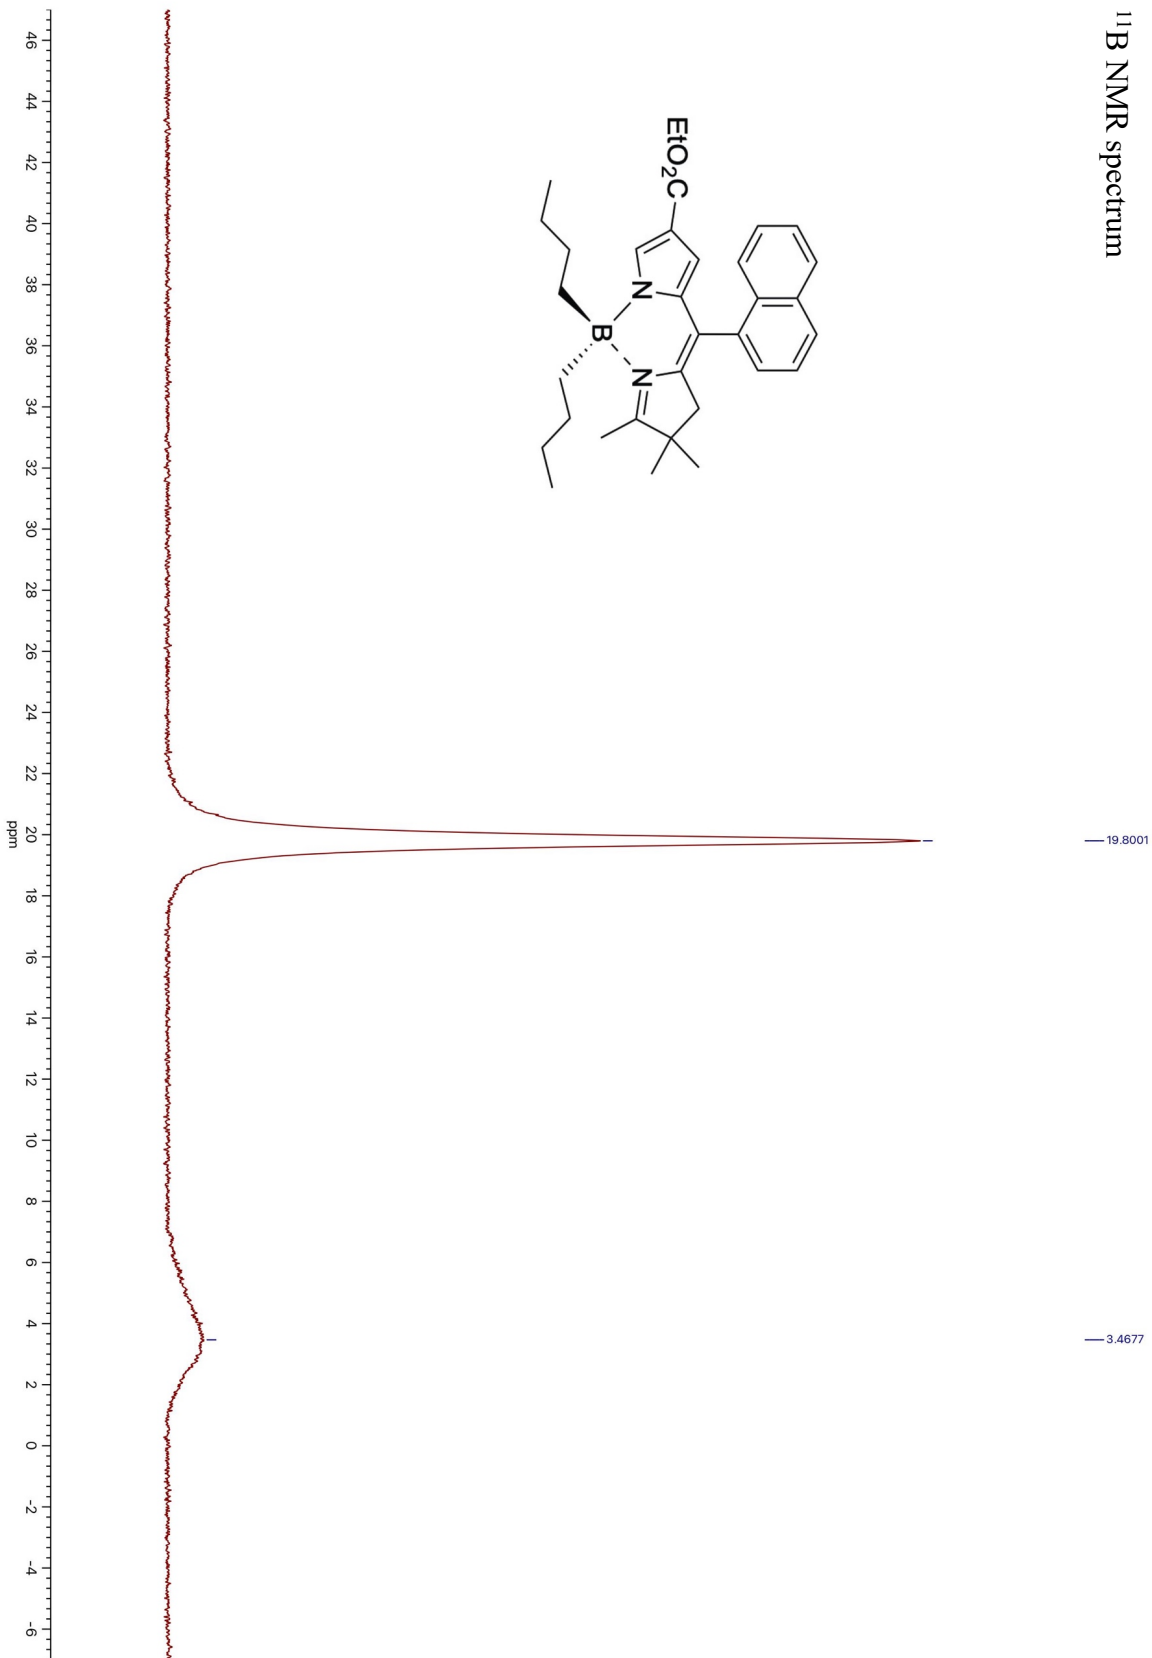

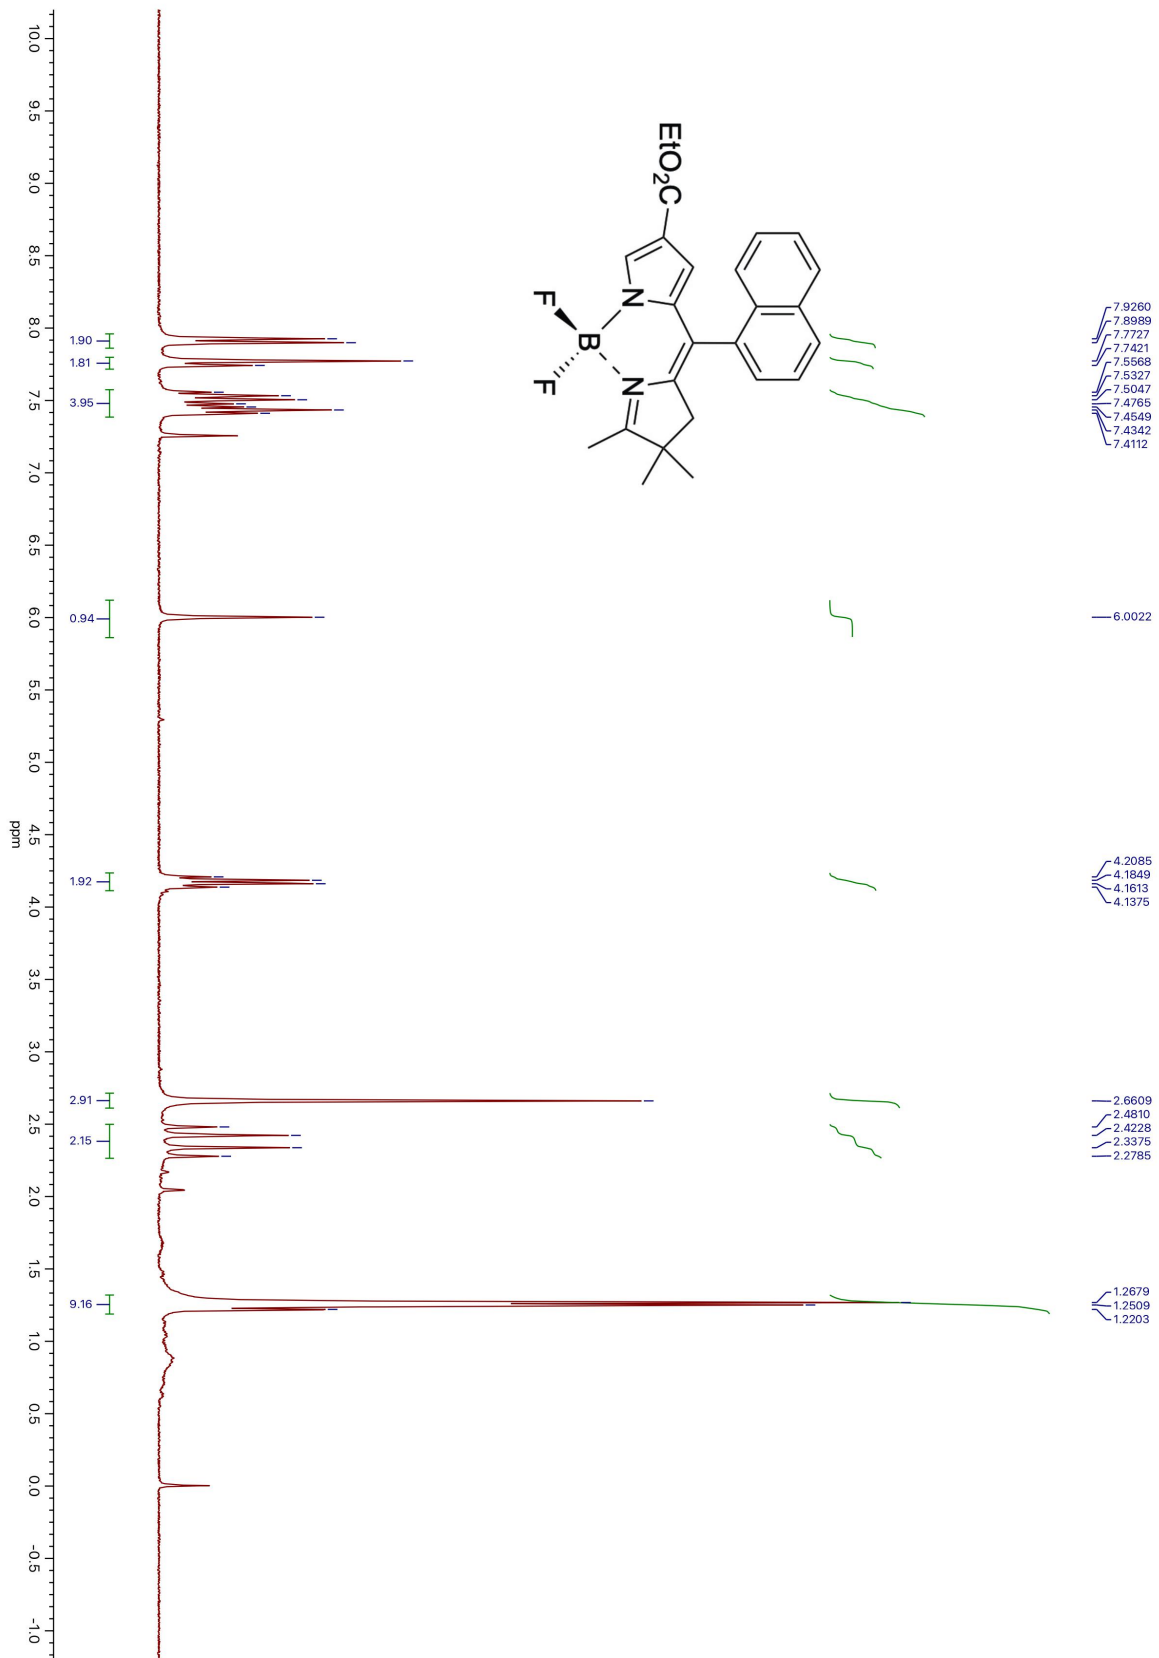



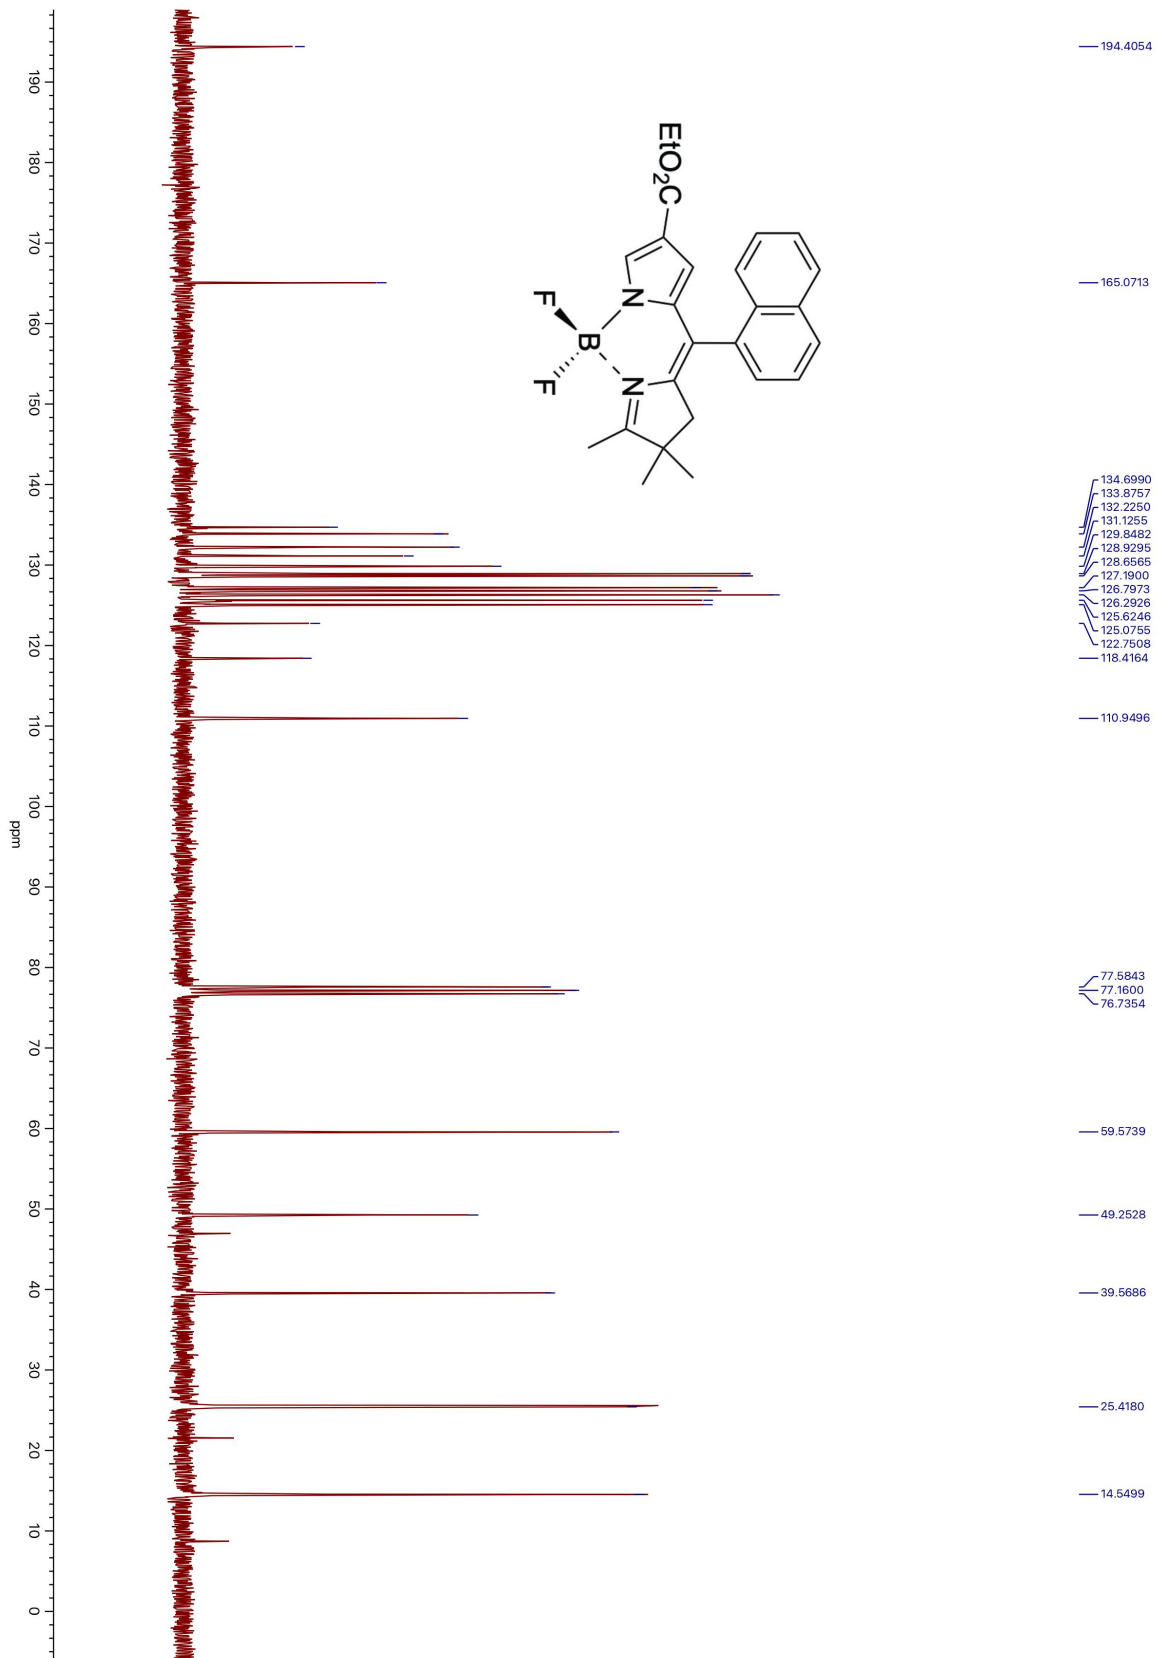

$^{11}\text{B}$  NMR spectrum

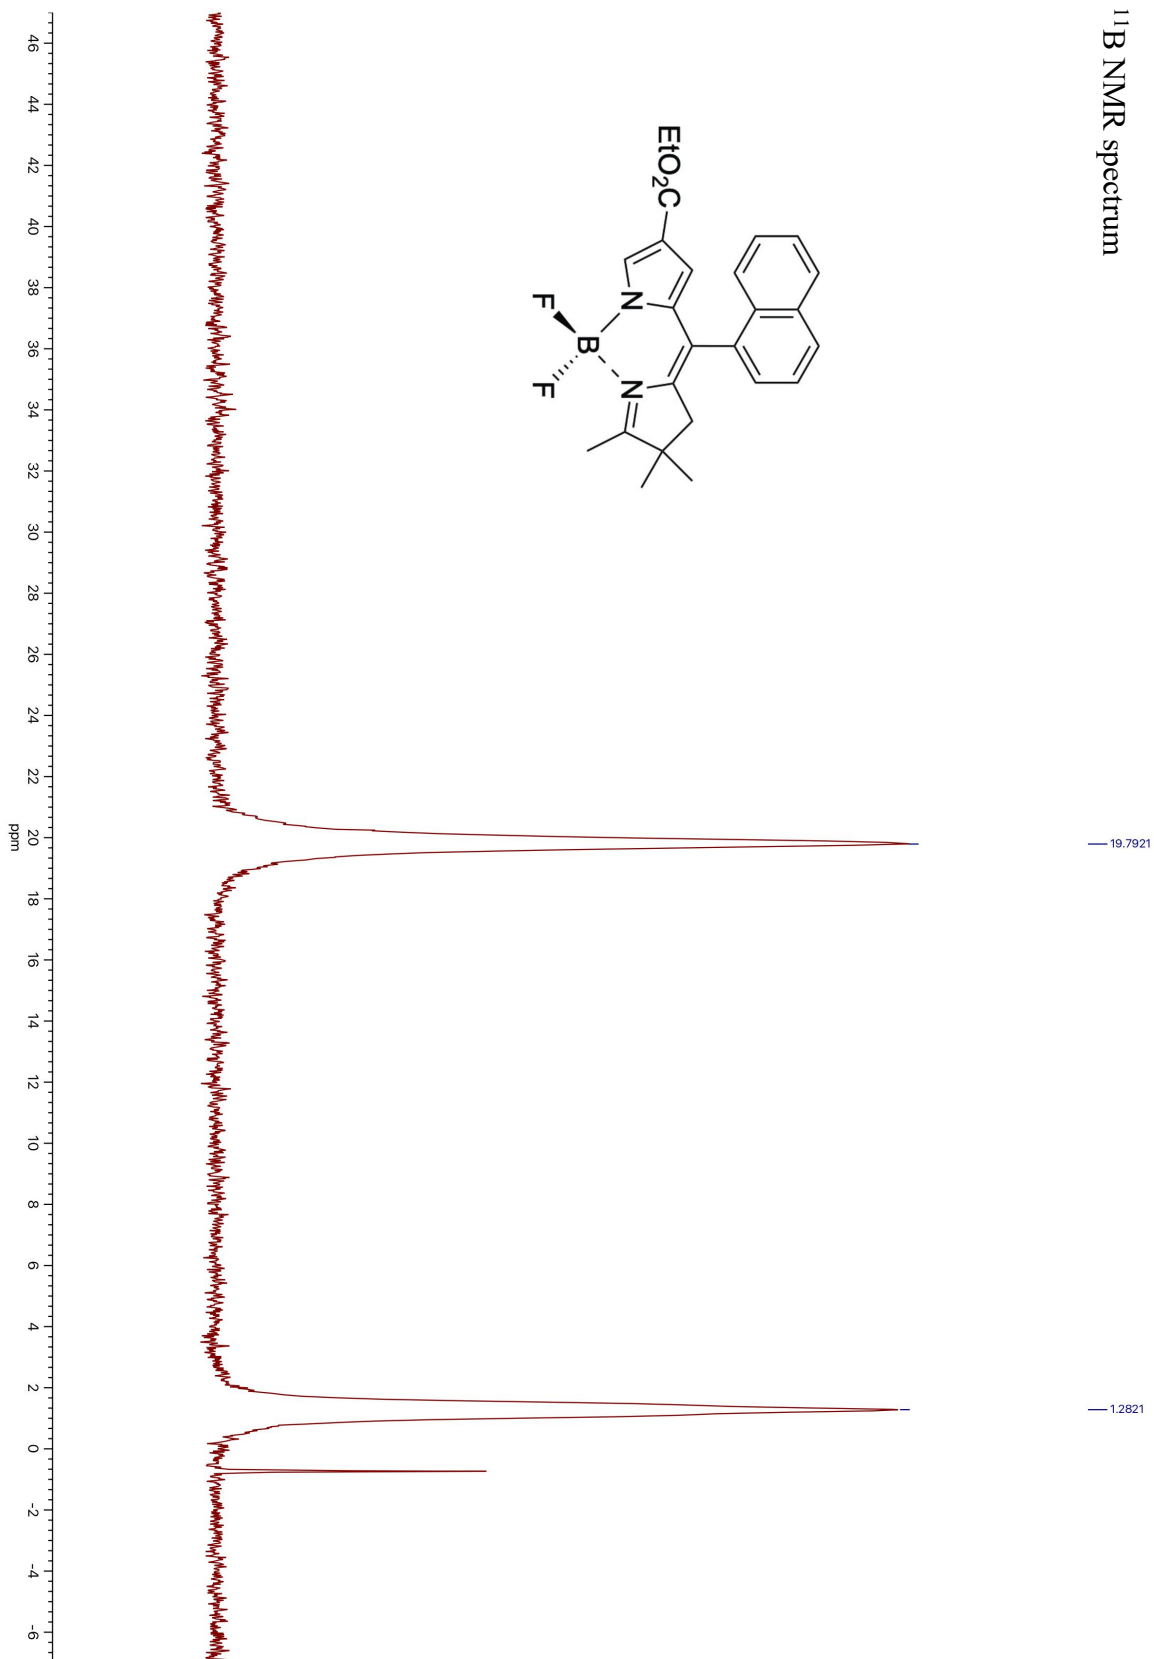

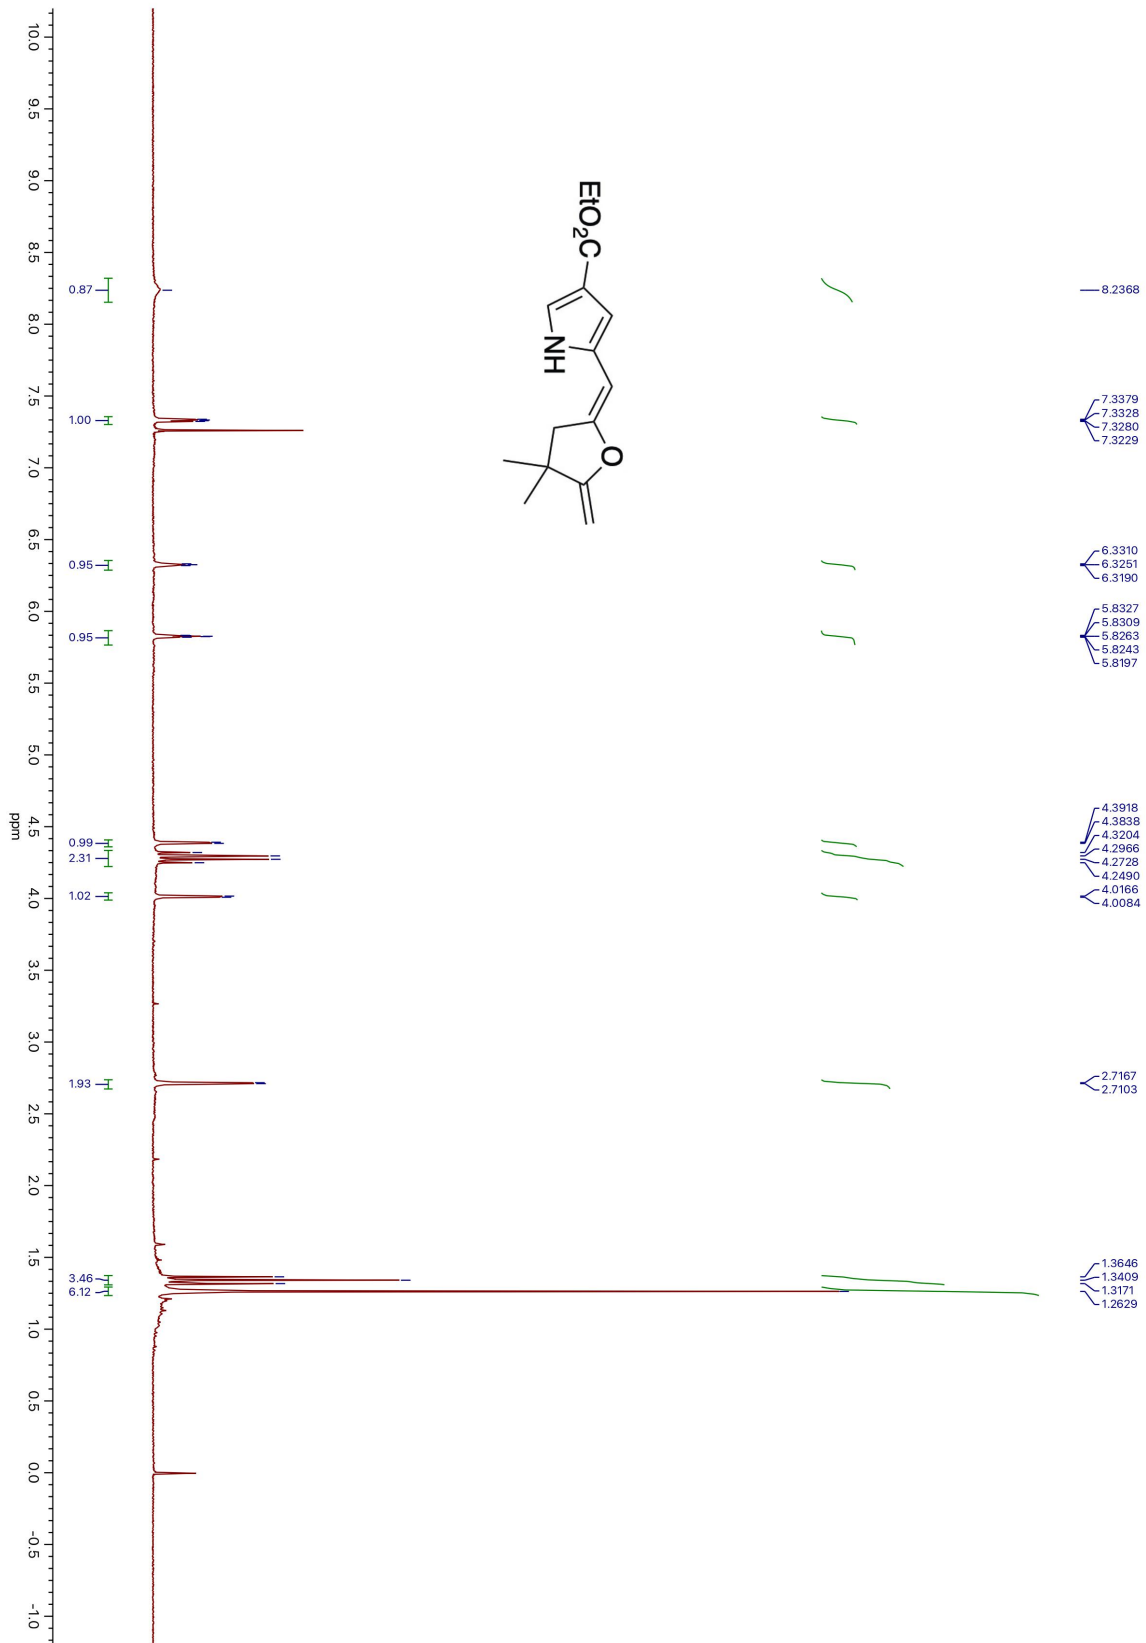

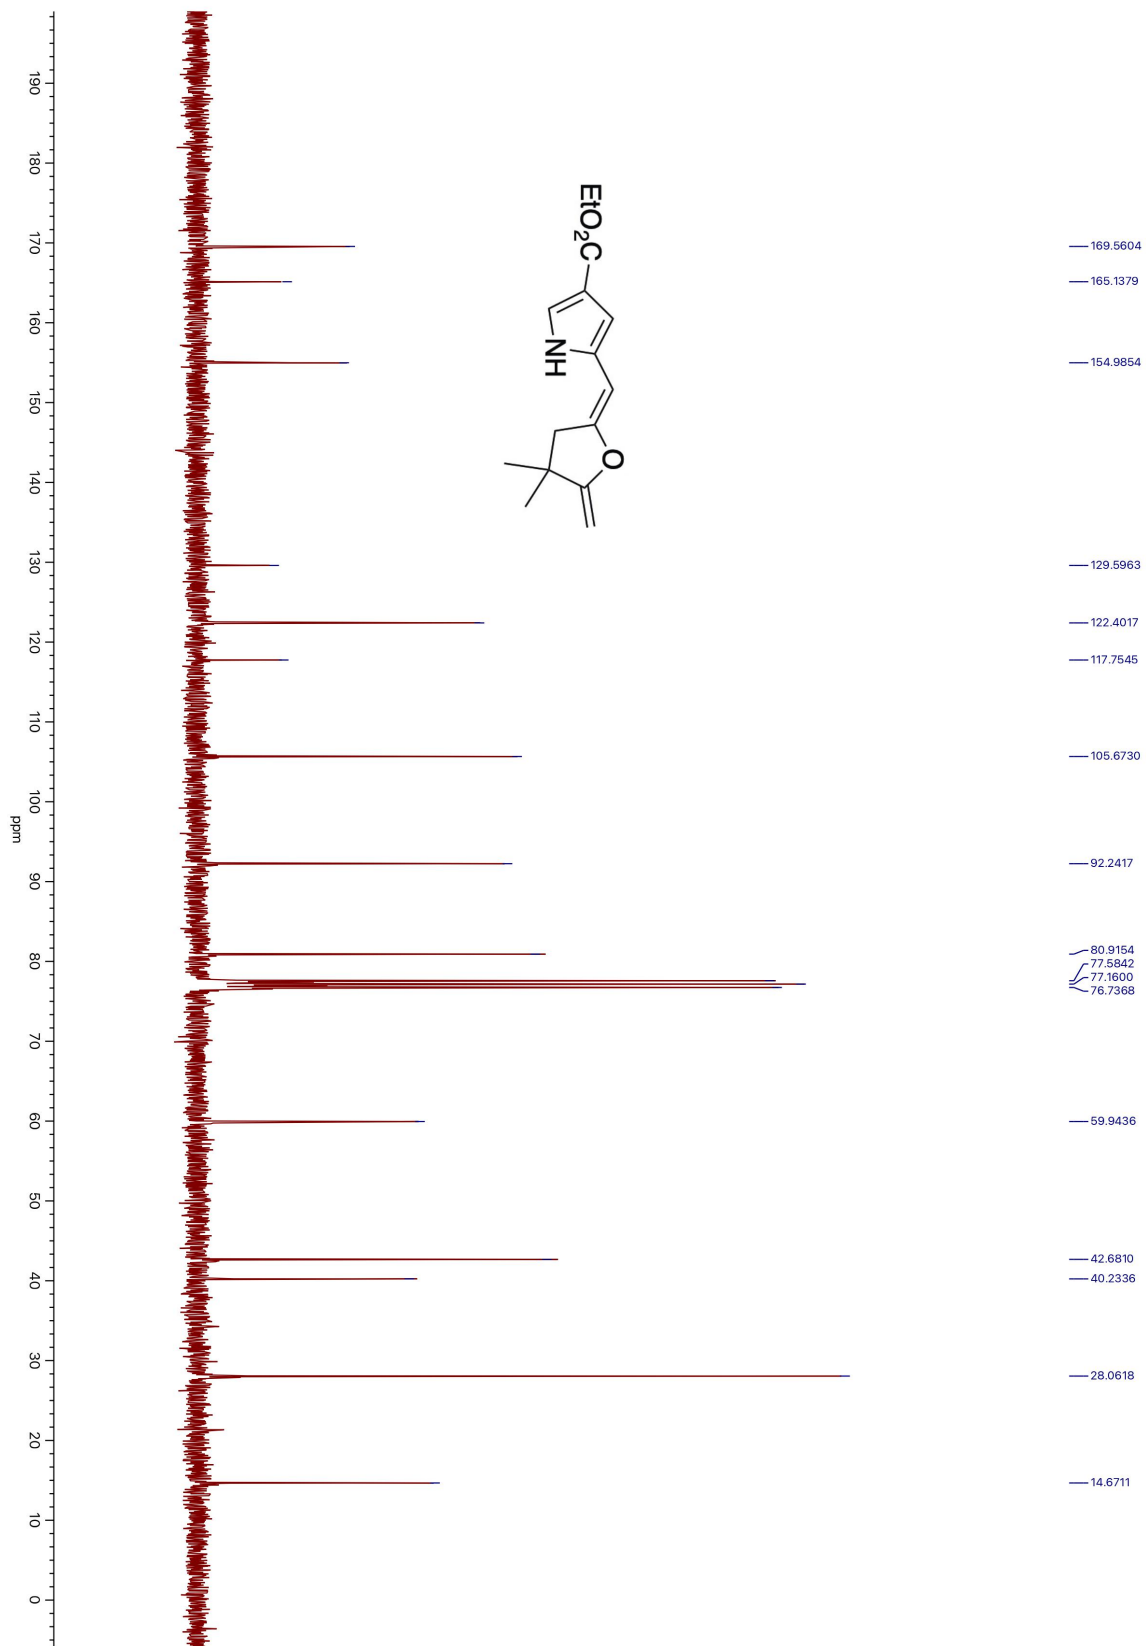

Supplement: c9nj01114e1.pdf [file c9nj01114e1.pdf]
